# Supplementary material for: Genome-wide analysis of the Glycerol-3-Phosphate Acyltransferase (GPAT) gene family reveals the evolution and diversification of plant GPATs
Source: PubMed Central journal article supplement (PMC5913721; doi:10.1590/1678-4685-gmb-2017-0076), 2018-03-19

# Supplementary Material to "Genome-wide analysis of the Glycerol-3-Phosphate Acyltransferase (GPAT) gene family reveals the evolution and diversification of plant GPATs"

GPAT1\_Ath\_AT1G06520

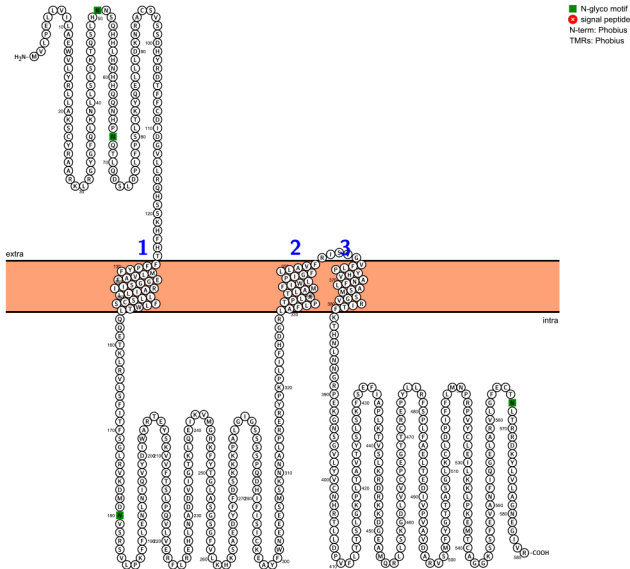

# GPAT2\_Ath\_AT1G02390

- N-glyco motif
- signal peptide
- N-term: Phobius
- TMRs: Phobius

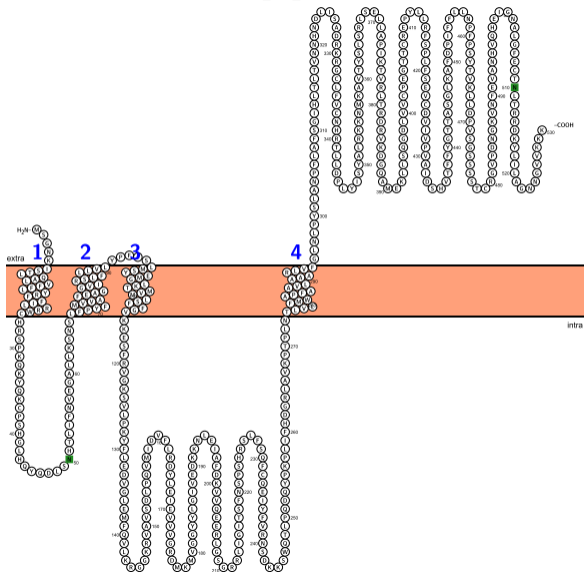

# GPAT3\_Ath\_AT4G01950

- N-glyco motif
- signal peptide
- N-term: Phobius
- TMRs: Phobius

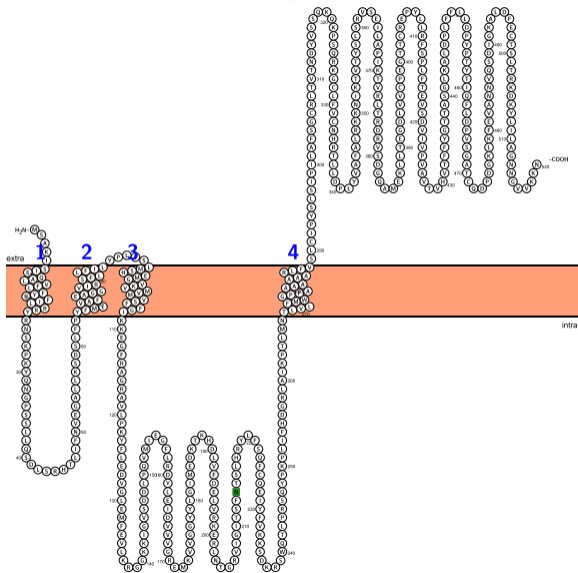

# GPAT4\_Ath\_AT1G01610

- N-glyco motif
- signal peptide
- N-term: Phobius
- TMRs: Phobius

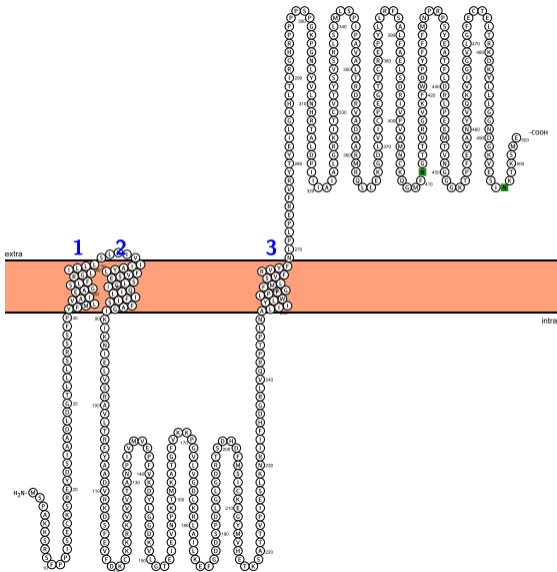

# GPAT5\_Ath\_AT3G11430

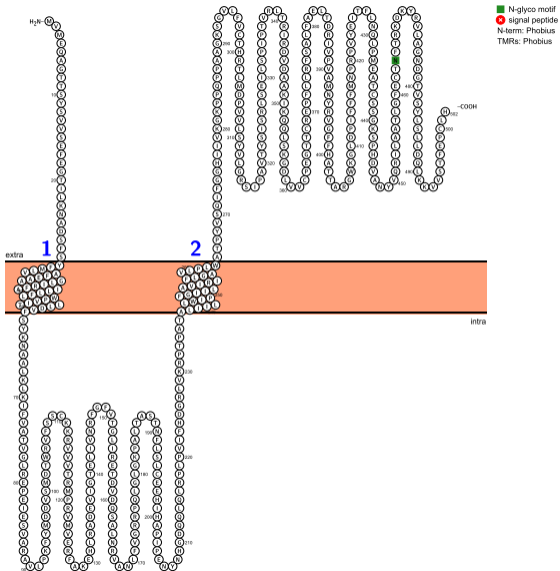

GPA<sub>t6</sub>\_Ath\_AT2G38110

- N-glyco motif
- signal peptide
- N-term: Phobius
- TMRs: Phobius

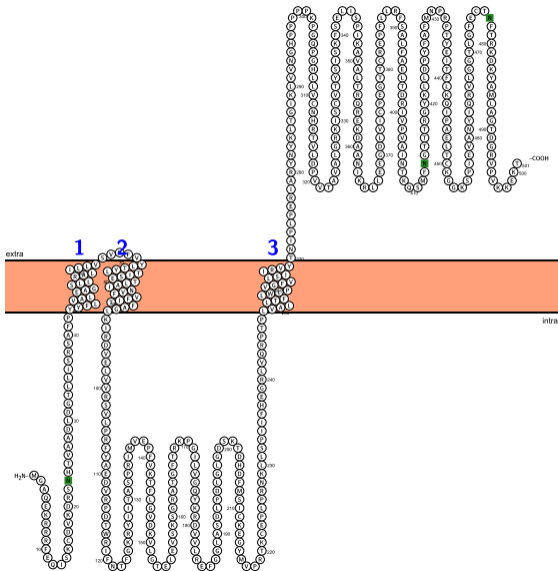

# GPAT7\_Ath\_AT5G06090

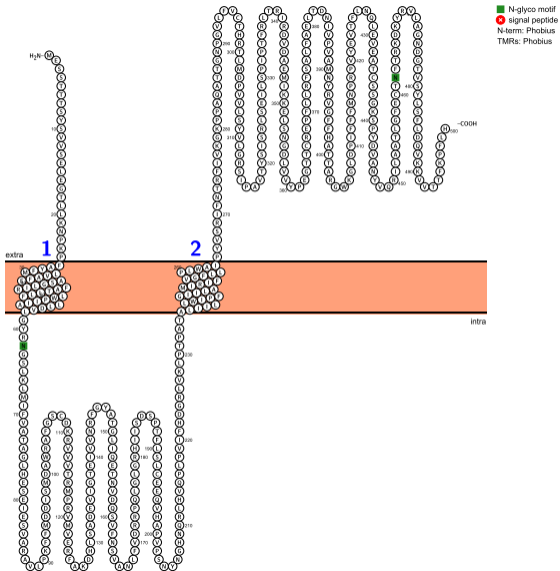

# GPAT8\_Ath\_AT4G00400

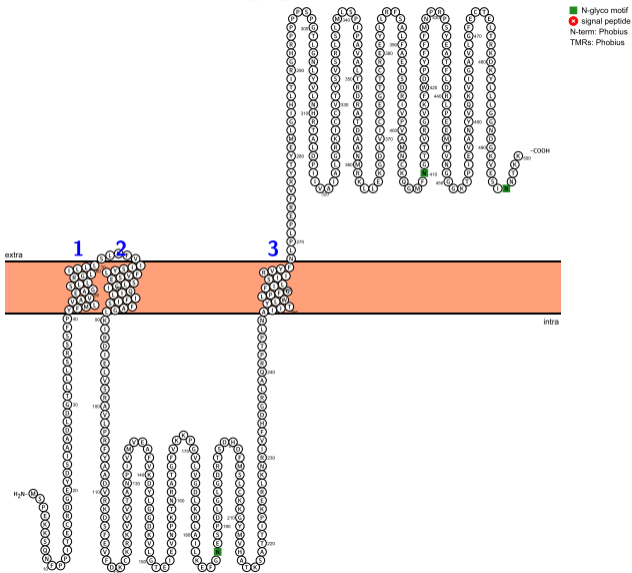







## Ath\_AT1G32200

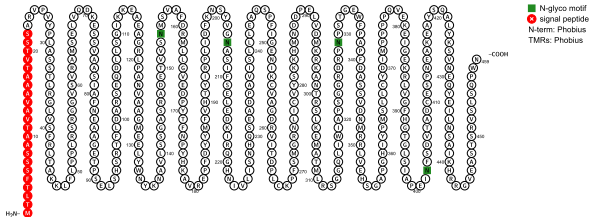

extra

intra

# Osa\_LOC\_Os01g44069

- N-glyco motif
- + signal peptide
- N-term: Phobius
- TMRs: Phobius

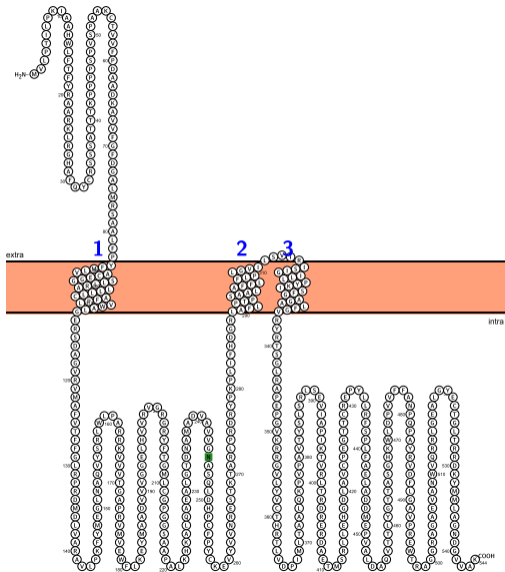

## Osa\_LOC\_Os10g27330

■ N-glyco motif  
+ signal peptide  
 N-term: Phobius  
 TMRs: Phobius

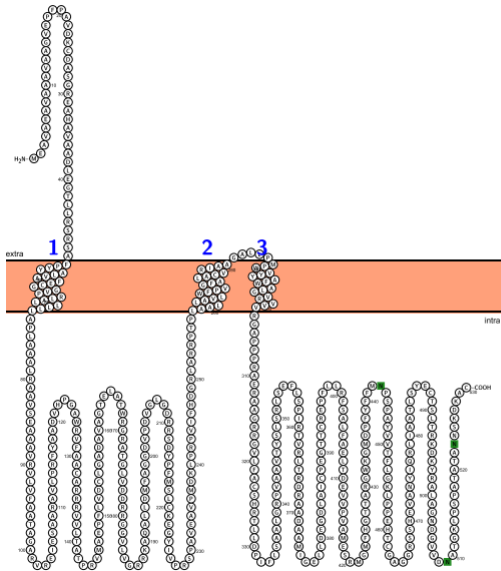

# Osa\_LOC\_Os03g52570

- N-glyco motif
- + signal peptide
- N-term: Phobius
- TMRs: Phobius

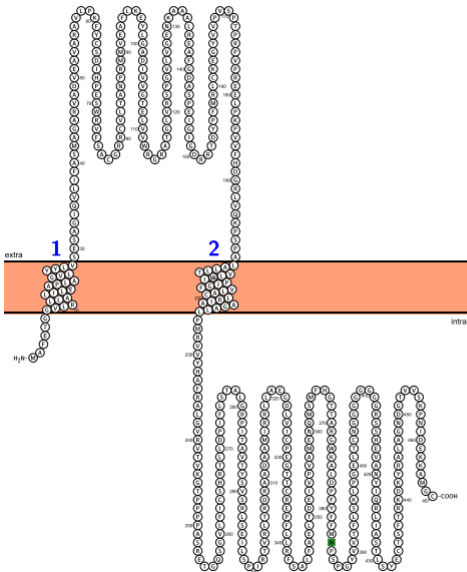

# Osa\_LOC\_Os01g63580

- N-glyco motif
- signal peptide
- N-term: Phobius
- TMRs: Phobius

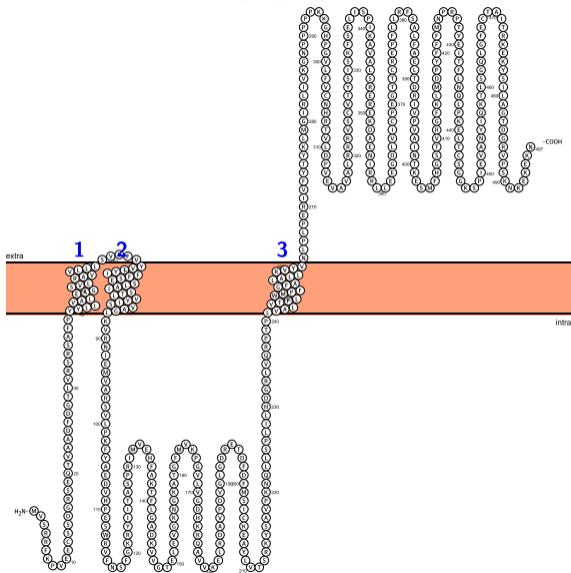

# Osa\_LOC\_Os05g38350

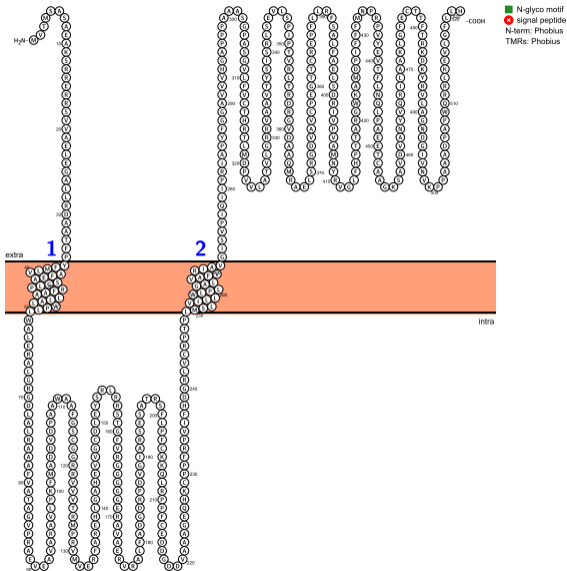



# Osa\_LOC\_Os11g45400

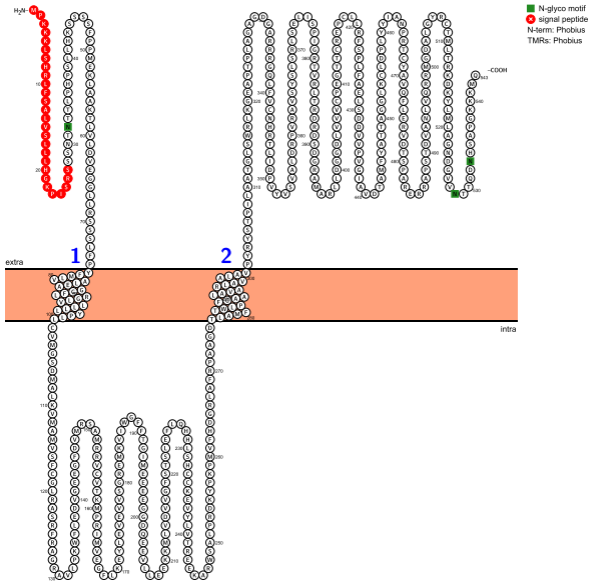

# Osa\_LOC\_Os02g02340

- N-glyco motif
- signal peptide
- N-term: Phobius
- TMRs: Phobius

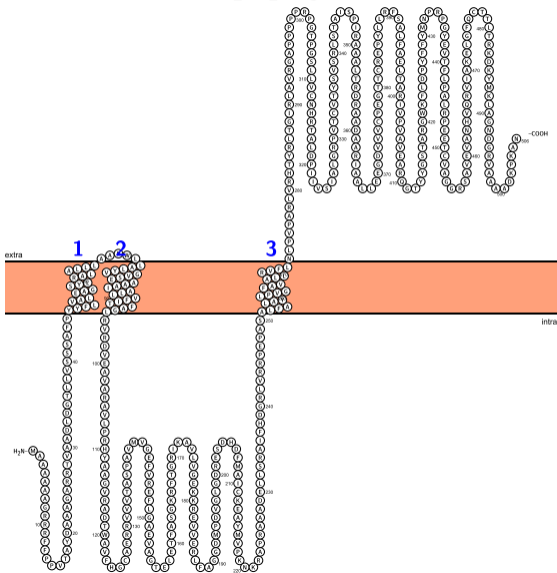

## Osa\_LOC\_Os05g20100

■ N-glyco motif  
● signal peptide  
 N-term: Phobius  
 TMRs: Phobius

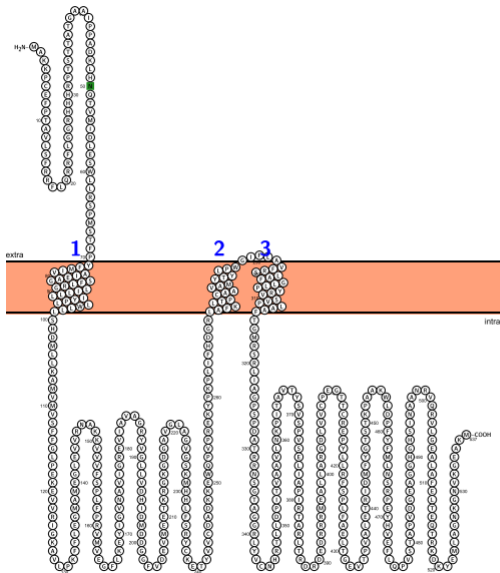

## Osa\_LOC\_Os08g03700

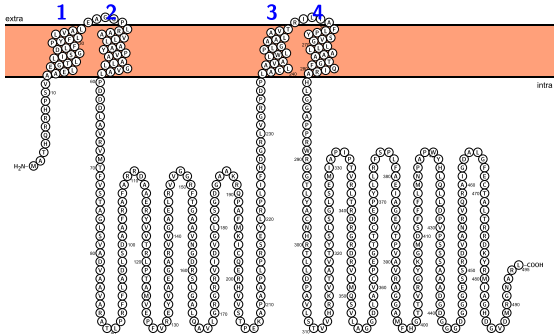

- N-glyco motif
- ✖ signal peptide
- N-term: Phobius
- TMRs: Phobius

# Osa\_LOC\_Os01g19390

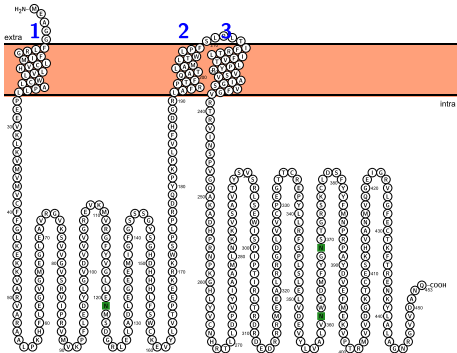

- N-glyco motif
- ✕ signal peptide
- N-term: Phobius
- TMRs: Phobius

# Osa\_LOC\_Os12g37600

■ N-glyco motif  
⊕ signal peptide  
 N-term: Phobius  
 TMRs: Phobius

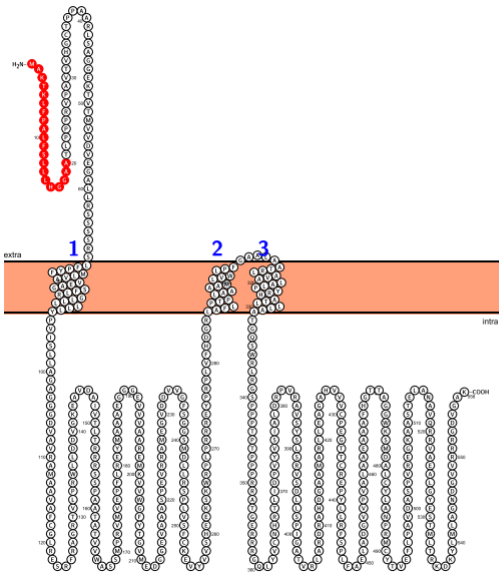

# Osa\_LOC\_Os03g61720

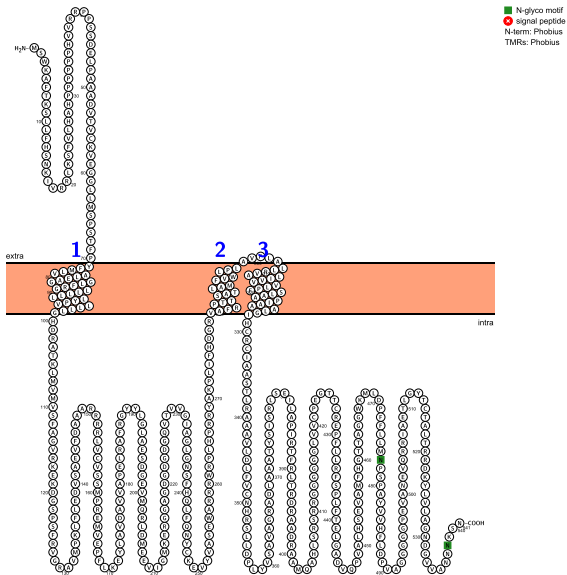

# Osa\_LOC\_Os01g14900

- N-glyco motif
- signal peptide
- N-term: Phobius
- TMRs: Phobius

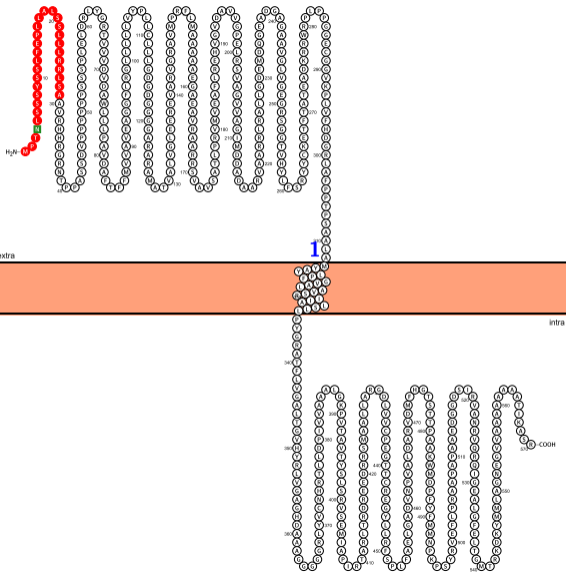



## Osa\_LOC\_Os05g37600

■ N-glyco motif  
● signal peptide  
 N-term: Phobius  
 TMRs: Phobius

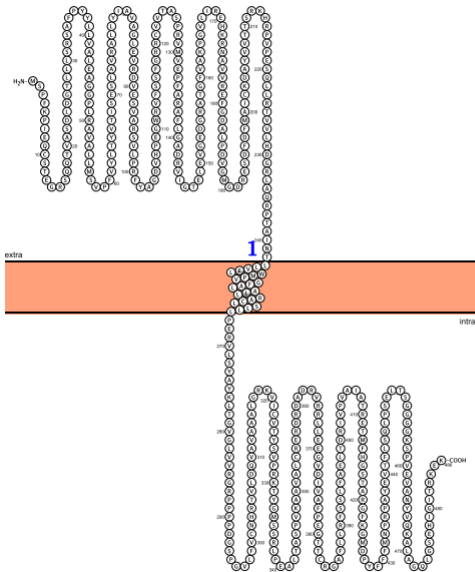

# Osa\_LOC\_Os10g41070

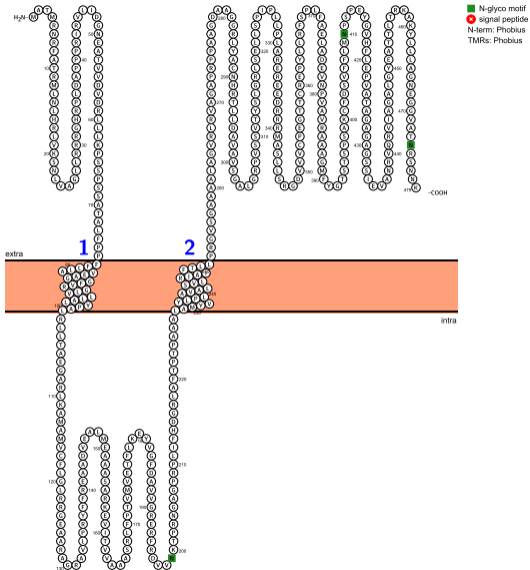

# Osa\_LOC\_Os01g22560

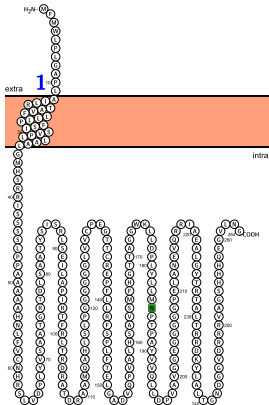

# Osa\_LOC\_Os07g34730

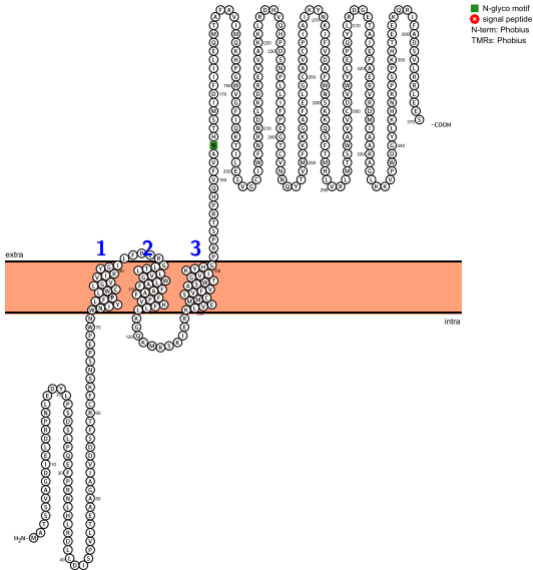

# Osa\_LOC\_Os10g42720

extra

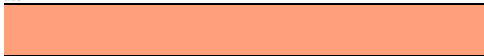

intra

- N-glyco motif
- ⊗ signal peptide
- N-term: Phobius
- TMRs: Phobius

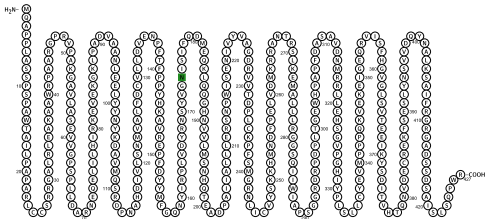

# Smo\_80075

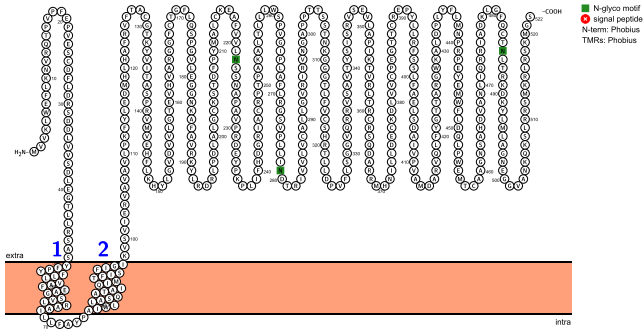

## Smo\_118155

■ N-glyco motif  
+ signal peptide  
 N-term: Phobius  
 TMRs: Phobius

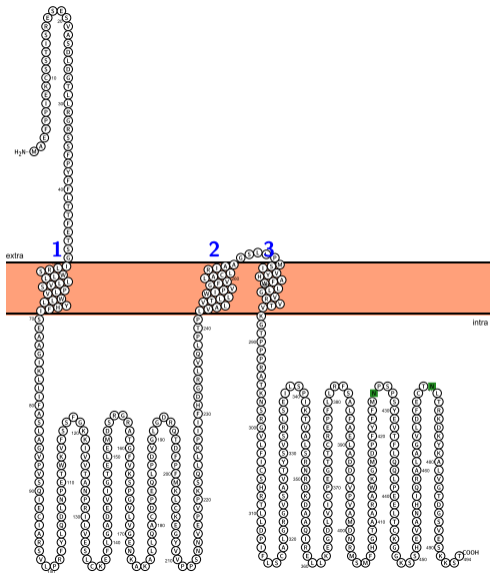

## Smo\_90219

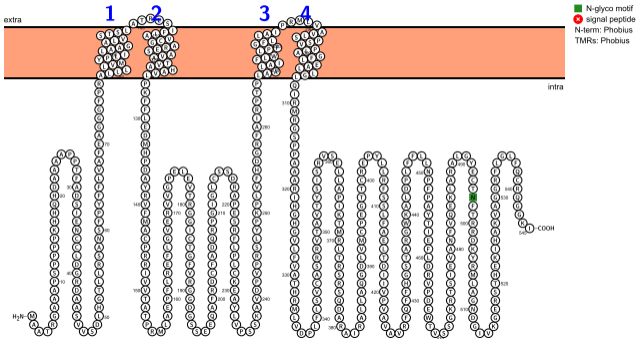



## Smo\_405228

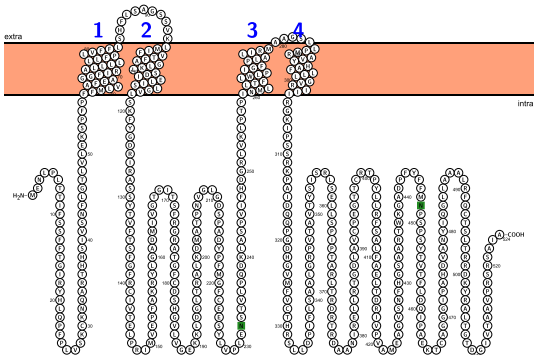

■ N-glyco motif

● signal peptide

N-term: Phobius

TMRs: Phobius

# Smo\_80614

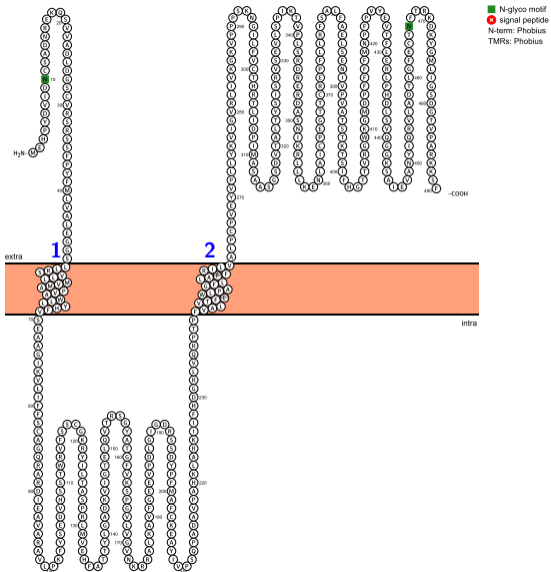

## Smo\_170163

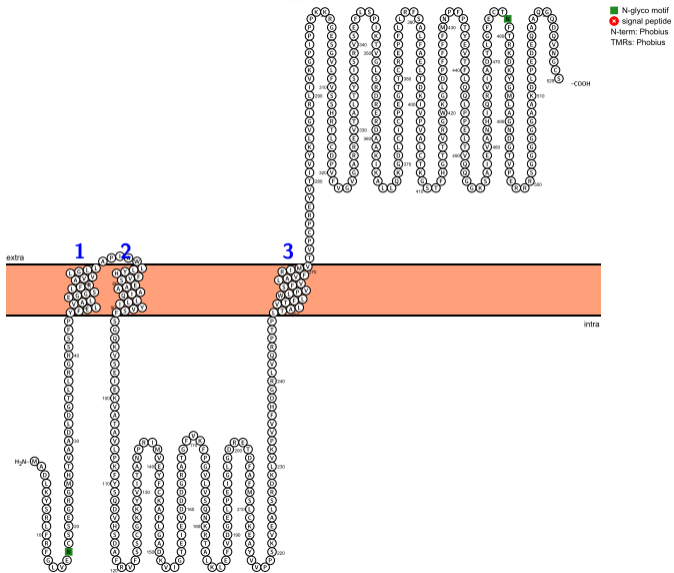

## Smo\_164779

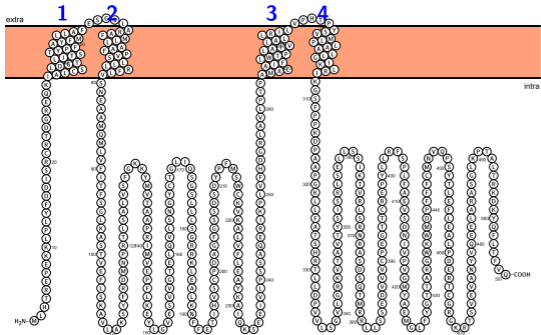

- N-glyco motif
- ✕ signal peptide
- N-term: Phobius
- TMRs: Phobius

# Smo\_63752

- N-glyco motif
- ✖ signal peptide
- N-term: Phobius
- TMRs: Phobius

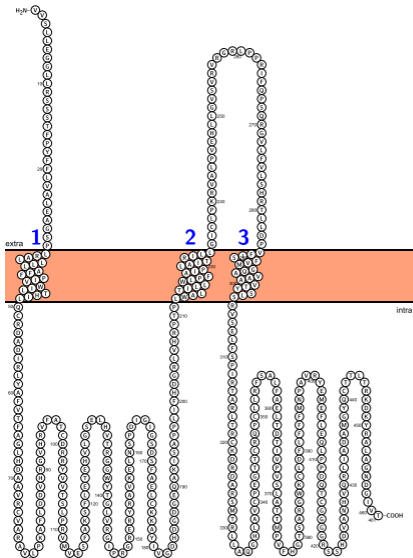

## Smo\_233008

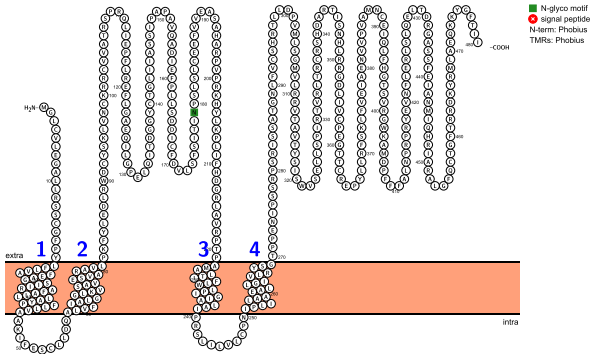

## Smo\_405007

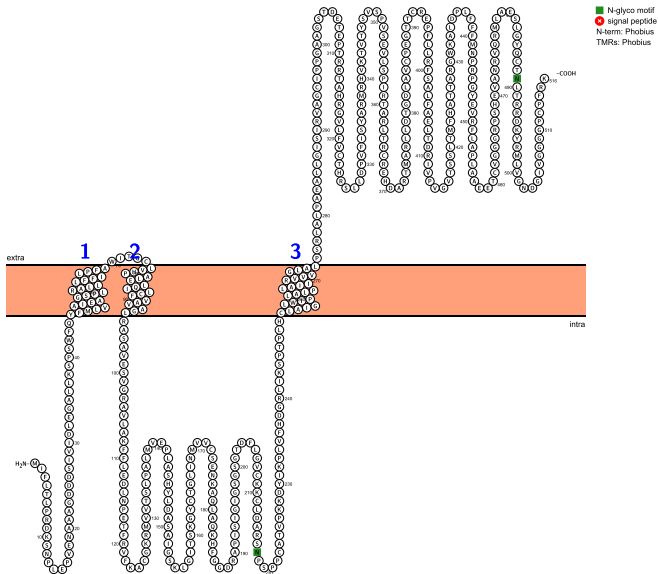

# Smo\_152980

- N-glyco motif
- + signal peptide
- N-term: Phobius
- TMRs: Phobius

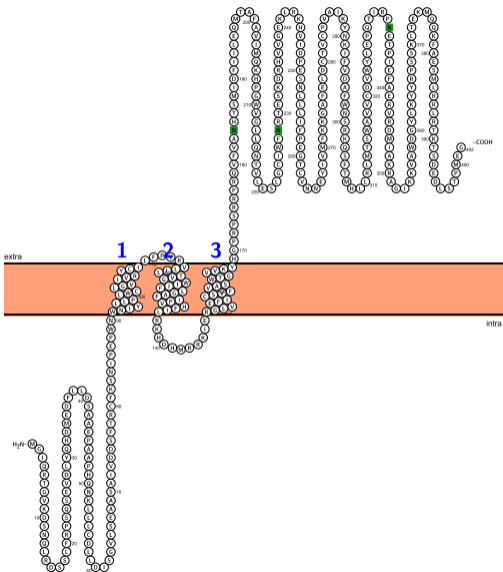



## Smo\_132845

■ N-glyco motif  
✖ signal peptide  
 N-term: Phobius  
 TMRs: Phobius

extra

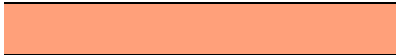

intra

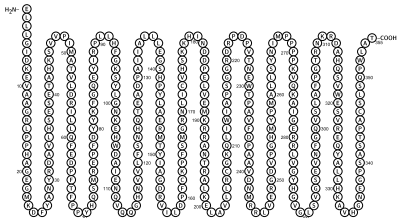

## Ppa\_Pp3c6\_29200

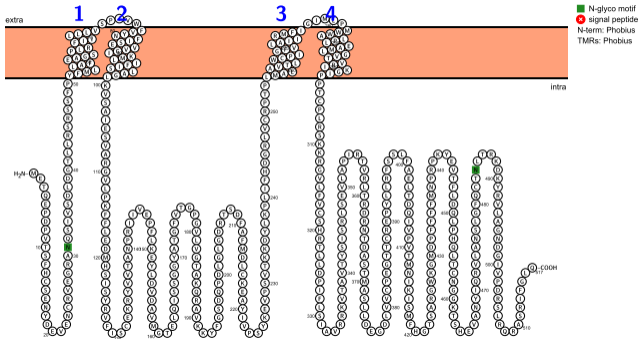

# Ppa\_Pp3c2\_18040

- N-glyco motif
- signal peptide
- N-term: Phobius
- TMRs: Phobius

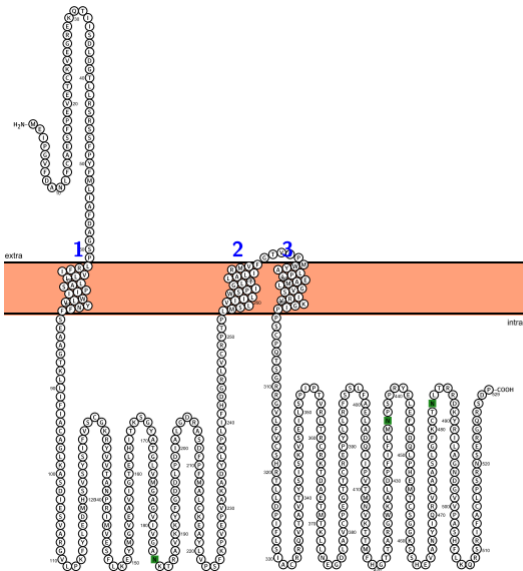

# Ppa\_Pp3c7\_7840

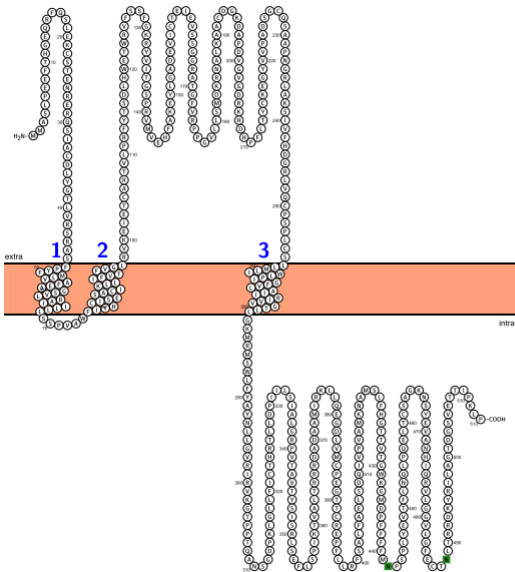

# Ppa\_Pp3c5\_1510

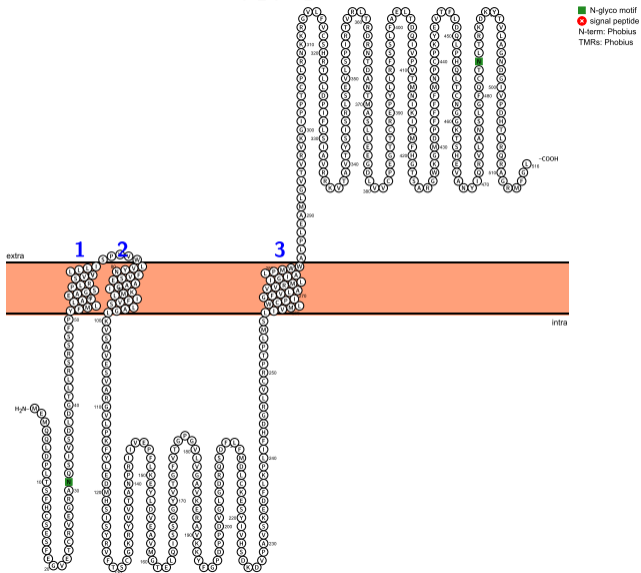

## Ppa\_Pp3c20\_9340

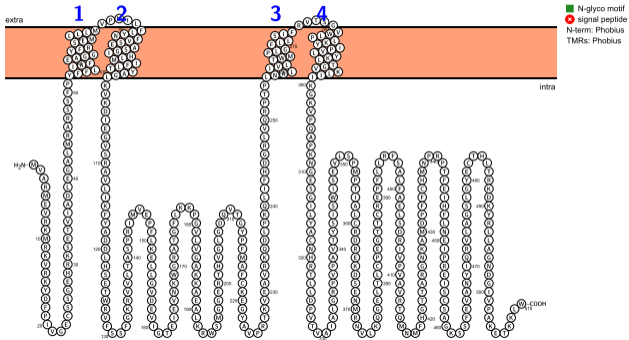

# Ppa\_Pp3c6\_29290

- N-glyco motif
- ⊕ signal peptide
- N-term: Phobius
- TMRs: Phobius

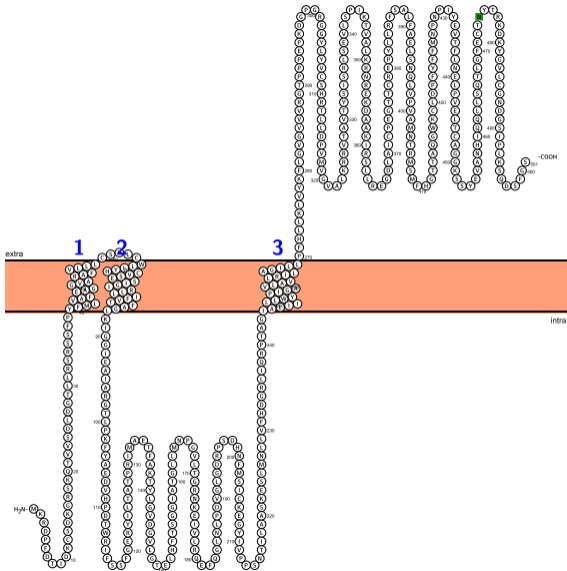





# Ppa\_Pp3c11\_26030

- N-glyco motif
- signal peptide
- N-term: Phobius
- TMRs: Phobius

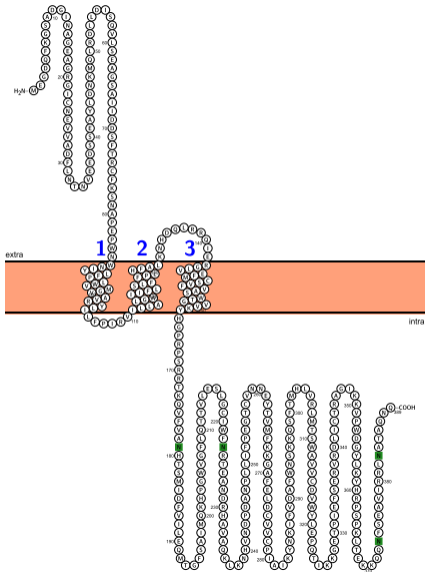



## Ppa\_Pp3c7\_2970

extra

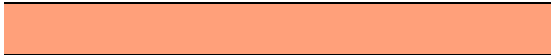

intra

- N-glyco motif
- ✖ signal peptide
- N-term: Phobius
- TMRs: Phobius

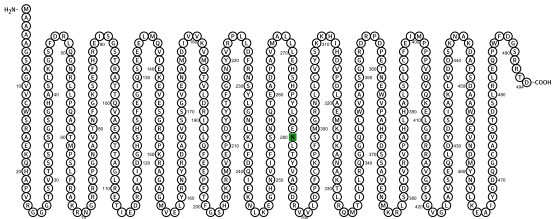

# Vca\_Vocar\_0002s0353

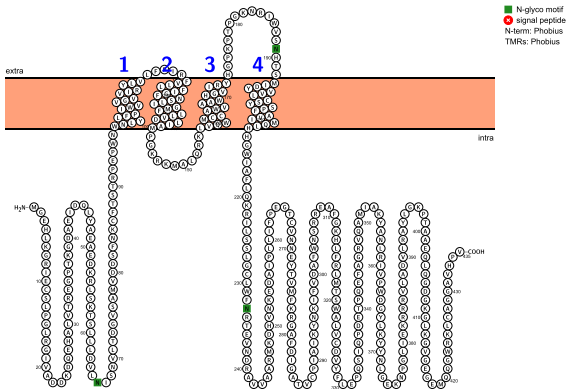

Supplement: 1415-4757-GMB-41-01-2017-0076-s004.pdf [file 1415-4757-GMB-41-01-2017-0076-s004.pdf]
