# Supplementary material for: Genome-wide analysis of the Glycerol-3-Phosphate Acyltransferase (GPAT) gene family reveals the evolution and diversification of plant GPATs
Source: PubMed Central journal article supplement (PMC5913721; doi:10.1590/1678-4685-gmb-2017-0076), 2018-03-19
Supplement: 1415-4757-GMB-41-01-2017-0076-s001.pdf [file 1415-4757-GMB-41-01-2017-0076-s001.pdf]

## Supplementary Material to “Genome-wide analysis of the Glycerol-3-Phosphate Acyltransferase (GPAT) gene family reveals the evolution and diversification of plant GPATs”

**Table S1** - Species, gene name, accession numbers, protein length, protein domain information and number of introns of GPAT sequences retrieved in this study.

| Species                           | Acronym | Protein Accession Number | Protein Length | Protein Domain                                                                          | n° Introns |
|-----------------------------------|---------|--------------------------|----------------|-----------------------------------------------------------------------------------------|------------|
| <i>Physcomitrella patens</i>      | Ppa     | Pp3c6_29200              | 517            | Acyltransferase (PF01553) and HAD (PF12710)                                             | 0          |
| <i>Physcomitrella patens</i>      | Ppa     | Pp3c2_18040              | 529            | Acyltransferase (PF01553) and HAD (PF12710)                                             | 1          |
| <i>Physcomitrella patens</i>      | Ppa     | Pp3c7_7840               | 513            | Acyltransferase (PF01553)                                                               | 1          |
| <i>Physcomitrella patens</i>      | Ppa     | Pp3c5_1510               | 516            | Acyltransferase (PF01553) and HAD (PF12710)                                             | 0          |
| <i>Physcomitrella patens</i>      | Ppa     | Pp3c20_9340              | 510            | Acyltransferase (PF01553)                                                               | 4          |
| <i>Physcomitrella patens</i>      | Ppa     | Pp3c6_29290              | 501            | Acyltransferase (PF01553)                                                               | 2          |
| <i>Physcomitrella patens</i>      | Ppa     | Pp3c8_21680              | 504            | Acyltransferase (PF01553) and HAD (PF12710)                                             | 1          |
| <i>Physcomitrella patens</i>      | Ppa     | Pp3c11_26030             | 389            | Acyltransferase (PF01553)                                                               | 11         |
| <i>Physcomitrella patens</i>      | Ppa     | Pp3c7_2970               | 488            | Acyltransferase (PF01553) and Glycerol-3-phosphate acyltransferase N-terminal (PF14829) | 12         |
| <i>Sphagnum fallax</i>            | Sfa     | Sphfalx0076s0073         | 559            | Acyltransferase (PF01553) and HAD (PF12710)                                             | 2          |
| <i>Sphagnum fallax</i>            | Sfa     | Sphfalx0011s0239         | 617            | Acyltransferase (PF01553)                                                               | 1          |
| <i>Sphagnum fallax</i>            | Sfa     | Sphfalx0028s0065         | 621            | Acyltransferase (PF01553) and HAD (PF12710)                                             | 1          |
| <i>Sphagnum fallax</i>            | Sfa     | Sphfalx0077s0057         | 522            | Acyltransferase (PF01553)                                                               | 1          |
| <i>Sphagnum fallax</i>            | Sfa     | Sphfalx0149s0036         | 480            | Acyltransferase (PF01553)                                                               | 1          |
| <i>Sphagnum fallax</i>            | Sfa     | Sphfalx0147s0003         | 616            | Acyltransferase (PF01553) and HAD (PF12710)                                             | 1          |
| <i>Sphagnum fallax</i>            | Sfa     | Sphfalx0054s0107         | 539            | Acyltransferase (PF01553)                                                               | 3          |
| <i>Sphagnum fallax</i>            | Sfa     | Sphfalx0026s0045         | 530            | Acyltransferase (PF01553)                                                               | 1          |
| <i>Sphagnum fallax</i>            | Sfa     | Sphfalx0033s0058         | 276            | None                                                                                    | 1          |
| <i>Sphagnum fallax</i>            | Sfa     | Sphfalx0016s0227         | 401            | Acyltransferase (PF01553)                                                               | 11         |
| <i>Sphagnum fallax</i>            | Sfa     | Sphfalx0001s0271         | 405            | Acyltransferase (PF01553)                                                               | 11         |
| <i>Sphagnum fallax</i>            | Sfa     | Sphfalx0164s0011         | 488            | Acyltransferase (PF01553) and Glycerol-3-phosphate acyltransferase N-terminal (PF14829) | 12         |
| <i>Selaginella moellendorffii</i> | Smo     | 80075                    | 522            | Acyltransferase (PF01553)                                                               | 1          |
| <i>Selaginella moellendorffii</i> | Smo     | 118155                   | 494            | Acyltransferase (PF01553) and HAD (PF12710)                                             | 1          |
| <i>Selaginella moellendorffii</i> | Smo     | 90219                    | 545            | Acyltransferase (PF01553)                                                               | 1          |
| <i>Selaginella moellendorffii</i> | Smo     | 405228                   | 524            | Acyltransferase (PF01553)                                                               | 1          |
| <i>Selaginella moellendorffii</i> | Smo     | 80614                    | 490            | Acyltransferase (PF01553)                                                               | 1          |
| <i>Selaginella moellendorffii</i> | Smo     | 170163                   | 529            | HAD (PF12710)                                                                           | 2          |
| <i>Selaginella moellendorffii</i> | Smo     | 164779                   | 507            | Acyltransferase (PF01553)                                                               | 1          |
| <i>Selaginella moellendorffii</i> | Smo     | 63752                    | 461            | HAD (PF12710)                                                                           | 1          |
| <i>Selaginella moellendorffii</i> | Smo     | 233008                   | 480            | Acyltransferase (PF01553)                                                               | 3          |
| <i>Selaginella moellendorffii</i> | Smo     | 405007                   | 516            | None                                                                                    | 1          |
| <i>Selaginella moellendorffii</i> | Smo     | 152980                   | 402            | Acyltransferase (PF01553)                                                               | 12         |
| <i>Selaginella moellendorffii</i> | Smo     | 132845                   | 355            | Acyltransferase (PF01553) and Glycerol-3-phosphate acyltransferase N-terminal (PF14829) | 10         |

| Species                        | Acronym | Protein Accession Number              | Protein Length | Protein Domain                                                                          | n° Introns |
|--------------------------------|---------|---------------------------------------|----------------|-----------------------------------------------------------------------------------------|------------|
| <i>Amborella trichopoda</i>    | Atr     | evm_27.TU.AmTr_v1.0_scaffold00003.239 | 541            | Acyltransferase (PF01553)                                                               | 1          |
| <i>Amborella trichopoda</i>    | Atr     | evm_27.TU.AmTr_v1.0_scaffold00179.5   | 521            | Acyltransferase (PF01553)                                                               | 1          |
| <i>Amborella trichopoda</i>    | Atr     | evm_27.TU.AmTr_v1.0_scaffold00133.34  | 505            | Acyltransferase (PF01553) and HAD (PF12710)                                             | 1          |
| <i>Amborella trichopoda</i>    | Atr     | evm_27.TU.AmTr_v1.0_scaffold00009.182 | 498            | Acyltransferase (PF01553) and HAD (PF12710)                                             | 1          |
| <i>Amborella trichopoda</i>    | Atr     | evm_27.TU.AmTr_v1.0_scaffold00012.248 | 483            | Acyltransferase (PF01553)                                                               | 1          |
| <i>Amborella trichopoda</i>    | Atr     | evm_27.TU.AmTr_v1.0_scaffold00029.356 | 324            | Acyltransferase (PF01553)                                                               | 1          |
| <i>Amborella trichopoda</i>    | Atr     | evm_27.TU.AmTr_v1.0_scaffold00048.62  | 472            | Acyltransferase (PF01553) and Glycerol-3-phosphate acyltransferase N-terminal (PF14829) | 11         |
| <i>Brachypodium distachyon</i> | Bdi     | Bradi2g44377                          | 552            | Acyltransferase (PF01553)                                                               | 1          |
| <i>Brachypodium distachyon</i> | Bdi     | Bradi1g09480                          | 510            | Acyltransferase (PF01553) and HAD (PF12710)                                             | 1          |
| <i>Brachypodium distachyon</i> | Bdi     | Bradi3g26655                          | 513            | Acyltransferase (PF01553)                                                               | 1          |
| <i>Brachypodium distachyon</i> | Bdi     | Bradi2g55290                          | 499            | Acyltransferase (PF01553) and HAD (PF12710)                                             | 1          |
| <i>Brachypodium distachyon</i> | Bdi     | Bradi2g11450                          | 531            | Acyltransferase (PF01553)                                                               | 1          |
| <i>Brachypodium distachyon</i> | Bdi     | Bradi1g73935                          | 512            | Acyltransferase (PF01553)                                                               | 1          |
| <i>Brachypodium distachyon</i> | Bdi     | Bradi2g33165                          | 532            | HAD (PF12710)                                                                           | 1          |
| <i>Brachypodium distachyon</i> | Bdi     | Bradi2g23420                          | 524            | None                                                                                    | 1          |
| <i>Brachypodium distachyon</i> | Bdi     | Bradi3g37245                          | 565            | Acyltransferase (PF01553)                                                               | 2          |
| <i>Brachypodium distachyon</i> | Bdi     | Bradi3g01350                          | 513            | Acyltransferase (PF01553)                                                               | 1          |
| <i>Brachypodium distachyon</i> | Bdi     | Bradi2g61040                          | 495            | Acyltransferase (PF01553)                                                               | 0          |
| <i>Brachypodium distachyon</i> | Bdi     | Bradi2g41702                          | 568            | Acyltransferase (PF01553)                                                               | 1          |
| <i>Brachypodium distachyon</i> | Bdi     | Bradi2g23400                          | 535            | None                                                                                    | 1          |
| <i>Brachypodium distachyon</i> | Bdi     | Bradi4g04550                          | 530            | Acyltransferase (PF01553)                                                               | 0          |
| <i>Brachypodium distachyon</i> | Bdi     | Bradi2g60975                          | 454            | Acyltransferase (PF01553)                                                               | 3          |
| <i>Brachypodium distachyon</i> | Bdi     | Bradi1g02805                          | 557            | Acyltransferase (PF01553)                                                               | 1          |
| <i>Brachypodium distachyon</i> | Bdi     | Bradi1g25790                          | 364            | Acyltransferase (PF01553)                                                               | 11         |
| <i>Brachypodium distachyon</i> | Bdi     | Bradi3g34260                          | 435            | Acyltransferase (PF01553) and Glycerol-3-phosphate acyltransferase N-terminal (PF14829) | 12         |
| <i>Oryza sativa</i>            | Osa     | LOC_Os01g44069                        | 544            | Acyltransferase (PF01553)                                                               | 1          |
| <i>Oryza sativa</i>            | Osa     | LOC_Os10g27330                        | 530            | Acyltransferase (PF01553)                                                               | 1          |
| <i>Oryza sativa</i>            | Osa     | LOC_Os03g52570                        | 467            | Acyltransferase (PF01553)                                                               | 1          |
| <i>Oryza sativa</i>            | Osa     | LOC_Os01g63580                        | 497            | Acyltransferase (PF01553) and HAD (PF12710)                                             | 1          |
| <i>Oryza sativa</i>            | Osa     | LOC_Os05g38350                        | 522            | HAD (PF12710)                                                                           | 1          |
| <i>Oryza sativa</i>            | Osa     | LOC_Os11g45400                        | 543            | Acyltransferase (PF01553)                                                               | 1          |
| <i>Oryza sativa</i>            | Osa     | LOC_Os02g02340                        | 506            | Acyltransferase (PF01553)                                                               | 1          |
| <i>Oryza sativa</i>            | Osa     | LOC_Os05g20100                        | 537            | Acyltransferase (PF01553)                                                               | 1          |
| <i>Oryza sativa</i>            | Osa     | LOC_Os08g03700                        | 495            | Acyltransferase (PF01553)                                                               | 0          |
| <i>Oryza sativa</i>            | Osa     | LOC_Os01g19390                        | 453            | Acyltransferase (PF01553)                                                               | 1          |
| <i>Oryza sativa</i>            | Osa     | LOC_Os12g37600                        | 558            | Acyltransferase (PF01553)                                                               | 1          |
| <i>Oryza sativa</i>            | Osa     | LOC_Os03g61720                        | 541            | Acyltransferase (PF01553)                                                               | 1          |
| <i>Oryza sativa</i>            | Osa     | LOC_Os01g14900                        | 570            | Acyltransferase (PF01553)                                                               | 1          |
| <i>Oryza sativa</i>            | Osa     | LOC_Os05g37600                        | 486            | Acyltransferase (PF01553) and HAD (PF12710)                                             | 1          |

| Species                | Acronym | Protein Accession Number | Protein Length | Protein Domain                                                                          | n° Introns |
|------------------------|---------|--------------------------|----------------|-----------------------------------------------------------------------------------------|------------|
| <i>Oryza sativa</i>    | Osa     | LOC_Os10g41070           | 479            | Acyltransferase (PF01553)                                                               | 1          |
| <i>Oryza sativa</i>    | Osa     | LOC_Os01g22560           | 264            | Acyltransferase (PF01553)                                                               | 0          |
| <i>Oryza sativa</i>    | Osa     | LOC_Os07g34730           | 370            | Acyltransferase (PF01553)                                                               | 11         |
| <i>Oryza sativa</i>    | Osa     | LOC_Os10g42720           | 427            | Acyltransferase (PF01553) and Glycerol-3-phosphate acyltransferase N-terminal (PF14829) | 13         |
| <i>Panicum hallii</i>  | Pha     | Pahal.E02373             | 543            | Acyltransferase (PF01553)                                                               | 1          |
| <i>Panicum hallii</i>  | Pha     | Pahal.I01831             | 547            | Acyltransferase (PF01553) and HAD (PF12710)                                             | 1          |
| <i>Panicum hallii</i>  | Pha     | Pahal.B03381             | 506            | Acyltransferase (PF01553)                                                               | 1          |
| <i>Panicum hallii</i>  | Pha     | Pahal.E00896.            | 499            | Acyltransferase (PF01553)                                                               | 1          |
| <i>Panicum hallii</i>  | Pha     | Pahal.I00545             | 506            | Acyltransferase (PF01553)                                                               | 1          |
| <i>Panicum hallii</i>  | Pha     | Pahal.E03181             | 539            | Acyltransferase (PF01553)                                                               | 1          |
| <i>Panicum hallii</i>  | Pha     | Pahal.C02741             | 514            | HAD (PF12710)                                                                           | 1          |
| <i>Panicum hallii</i>  | Pha     | Pahal.I04570             | 547            | Acyltransferase (PF01553)                                                               | 1          |
| <i>Panicum hallii</i>  | Pha     | Pahal.H00181             | 566            | Acyltransferase (PF01553)                                                               | 1          |
| <i>Panicum hallii</i>  | Pha     | Pahal.E03539             | 533            | None                                                                                    | 1          |
| <i>Panicum hallii</i>  | Pha     | Pahal.C03674             | 537            | None                                                                                    | 1          |
| <i>Panicum hallii</i>  | Pha     | Pahal.I01321             | 536            | None                                                                                    | 1          |
| <i>Panicum hallii</i>  | Pha     | Pahal.A00044             | 520            | Acyltransferase (PF01553)                                                               | 1          |
| <i>Panicum hallii</i>  | Pha     | Pahal.F02713             | 493            | Acyltransferase (PF01553)                                                               | 0          |
| <i>Panicum hallii</i>  | Pha     | Pahal.I04042             | 487            | Acyltransferase (PF01553)                                                               | 0          |
| <i>Panicum hallii</i>  | Pha     | Pahal.C02792             | 494            | HAD (PF12710)                                                                           | 1          |
| <i>Panicum hallii</i>  | Pha     | Pahal.B04165             | 423            | Acyltransferase (PF01553)                                                               | 11         |
| <i>Panicum hallii</i>  | Pha     | Pahal.I03757             | 455            | Acyltransferase (PF01553) and Glycerol-3-phosphate acyltransferase N-terminal (PF14829) | 13         |
| <i>Setaria italica</i> | Sit     | Seita.9G101700           | 512            | Acyltransferase (PF01553) and HAD (PF12710)                                             | 1          |
| <i>Setaria italica</i> | Sit     | Seita.9G261200           | 509            | Acyltransferase (PF01553) and HAD (PF12710)                                             | 1          |
| <i>Setaria italica</i> | Sit     | Seita.5G386400           | 498            | Acyltransferase (PF01553)                                                               | 1          |
| <i>Setaria italica</i> | Sit     | Seita.9G527800           | 507            | Acyltransferase (PF01553)                                                               | 2          |
| <i>Setaria italica</i> | Sit     | Seita.4G285600           | 502            | Acyltransferase (PF01553)                                                               | 1          |
| <i>Setaria italica</i> | Sit     | Seita.3G291600           | 536            | Acyltransferase (PF01553)                                                               | 1          |
| <i>Setaria italica</i> | Sit     | Seita.3G218600           | 517            | HAD (PF12710)                                                                           | 1          |
| <i>Setaria italica</i> | Sit     | Seita.5G028700           | 538            | Acyltransferase (PF01553)                                                               | 1          |
| <i>Setaria italica</i> | Sit     | Seita.3G223100           | 495            | Acyltransferase (PF01553)                                                               | 1          |
| <i>Setaria italica</i> | Sit     | Seita.5G060100           | 541            | Acyltransferase (PF01553)                                                               | 1          |
| <i>Setaria italica</i> | Sit     | Seita.8G234000           | 560            | Acyltransferase (PF01553)                                                               | 1          |
| <i>Setaria italica</i> | Sit     | Seita.9G023200           | 537            | None                                                                                    | 1          |
| <i>Setaria italica</i> | Sit     | Seita.3G334400           | 580            | Acyltransferase (PF01553)                                                               | 1          |
| <i>Setaria italica</i> | Sit     | Seita.1G116700           | 528            | Acyltransferase (PF01553)                                                               | 1          |
| <i>Setaria italica</i> | Sit     | Seita.6G074300           | 498            | Acyltransferase (PF01553)                                                               | 0          |
| <i>Setaria italica</i> | Sit     | Seita.3G219000           | 498            | Acyltransferase (PF01553)                                                               | 0          |
| <i>Setaria italica</i> | Sit     | Seita.9G527900           | 438            | HAD (PF12710)                                                                           | 3          |

| Species                | Acronym | Protein Accession Number | Protein Length | Protein Domain                                                                          | n° Introns |
|------------------------|---------|--------------------------|----------------|-----------------------------------------------------------------------------------------|------------|
| <i>Setaria italica</i> | Sit     | Seita.9G323800           | 493            | Acyltransferase (PF01553)                                                               | 0          |
| <i>Setaria italica</i> | Sit     | Seita.2G339000           | 371            | Acyltransferase (PF01553)                                                               | 11         |
| <i>Setaria italica</i> | Sit     | Seita.9G307400           | 449            | Acyltransferase (PF01553) and Glycerol-3-phosphate acyltransferase N-terminal (PF14829) | 13         |
| <i>Setaria viridis</i> | Svi     | Sevir.5G243800           | 551            | Acyltransferase (PF01553)                                                               | 1          |
| <i>Setaria viridis</i> | Svi     | Sevir.9G099900           | 512            | Acyltransferase (PF01553) and HAD (PF12710)                                             | 1          |
| <i>Setaria viridis</i> | Svi     | Sevir.9G264100           | 509            | Acyltransferase (PF01553) and HAD (PF12710)                                             | 1          |
| <i>Setaria viridis</i> | Svi     | Sevir.5G391500           | 498            | Acyltransferase (PF01553)                                                               | 1          |
| <i>Setaria viridis</i> | Svi     | Sevir.9G532600           | 507            | Acyltransferase (PF01553)                                                               | 2          |
| <i>Setaria viridis</i> | Svi     | Sevir.3G300000           | 536            | Acyltransferase (PF01553)                                                               | 1          |
| <i>Setaria viridis</i> | Svi     | Sevir.4G298000           | 502            | Acyltransferase (PF01553)                                                               | 1          |
| <i>Setaria viridis</i> | Svi     | Sevir.5G027400           | 538            | Acyltransferase (PF01553)                                                               | 1          |
| <i>Setaria viridis</i> | Svi     | Sevir.9G022800           | 531            | HAD (PF12710)                                                                           | 1          |
| <i>Setaria viridis</i> | Svi     | Sevir.3G228100           | 495            | Acyltransferase (PF01553)                                                               | 1          |
| <i>Setaria viridis</i> | Svi     | Sevir.5G059700           | 541            | Acyltransferase (PF01553)                                                               | 1          |
| <i>Setaria viridis</i> | Svi     | Sevir.8G244100           | 560            | Acyltransferase (PF01553)                                                               | 1          |
| <i>Setaria viridis</i> | Svi     | Sevir.3G348800           | 580            | Acyltransferase (PF01553)                                                               | 1          |
| <i>Setaria viridis</i> | Svi     | Sevir.1G115700           | 528            | Acyltransferase (PF01553)                                                               | 1          |
| <i>Setaria viridis</i> | Svi     | Sevir.6G073400           | 498            | Acyltransferase (PF01553)                                                               | 0          |
| <i>Setaria viridis</i> | Svi     | Sevir.3G224100           | 498            | Acyltransferase (PF01553)                                                               | 0          |
| <i>Setaria viridis</i> | Svi     | Sevir.9G329700           | 493            | Acyltransferase (PF01553)                                                               | 0          |
| <i>Setaria viridis</i> | Svi     | Sevir.2G349100           | 371            | Acyltransferase (PF01553)                                                               | 11         |
| <i>Setaria viridis</i> | Svi     | Sevir.9G312800           | 449            | Acyltransferase (PF01553) and Glycerol-3-phosphate acyltransferase N-terminal (PF14829) | 13         |
| <i>Sorghum bicolor</i> | Sbi     | Sobic.003G229700         | 572            | Acyltransferase (PF01553)                                                               | 1          |
| <i>Sorghum bicolor</i> | Sbi     | Sobic.001G099300         | 505            | Acyltransferase (PF01553) and HAD (PF12710)                                             | 2          |
| <i>Sorghum bicolor</i> | Sbi     | Sobic.001G250200         | 518            | Acyltransferase (PF01553)                                                               | 1          |
| <i>Sorghum bicolor</i> | Sbi     | Sobic.001G493300         | 524            | Acyltransferase (PF01553)                                                               | 1          |
| <i>Sorghum bicolor</i> | Sbi     | Sobic.003G360700         | 503            | Acyltransferase (PF01553)                                                               | 1          |
| <i>Sorghum bicolor</i> | Sbi     | Sobic.009G162000         | 522            | HAD (PF12710)                                                                           | 1          |
| <i>Sorghum bicolor</i> | Sbi     | Sobic.004G010300         | 518            | Acyltransferase (PF01553)                                                               | 1          |
| <i>Sorghum bicolor</i> | Sbi     | Sobic.003G114200         | 555            | None                                                                                    | 1          |
| <i>Sorghum bicolor</i> | Sbi     | Sobic.003G142500         | 537            | Acyltransferase (PF01553)                                                               | 1          |
| <i>Sorghum bicolor</i> | Sbi     | Sobic.008G130800         | 603            | Acyltransferase (PF01553)                                                               | 1          |
| <i>Sorghum bicolor</i> | Sbi     | Sobic.001G026100         | 569            | Acyltransferase (PF01553)                                                               | 1          |
| <i>Sorghum bicolor</i> | Sbi     | Sobic.005G214400         | 581            | Acyltransferase (PF01553)                                                               | 1          |
| <i>Sorghum bicolor</i> | Sbi     | Sobic.009G202600         | 497            | Acyltransferase (PF01553)                                                               | 0          |
| <i>Sorghum bicolor</i> | Sbi     | Sobic.002G325300         | 371            | Acyltransferase (PF01553)                                                               | 11         |
| <i>Sorghum bicolor</i> | Sbi     | Sobic.001G283700         | 448            | Acyltransferase (PF01553) and Glycerol-3-phosphate acyltransferase N-terminal (PF14829) | 13         |
| <i>Zea mays</i>        | Zma     | GRMZM2G165681            | 371            | Acyltransferase (PF01553)                                                               | 11         |
| <i>Zea mays</i>        | Zma     | GRMZM2G123987            | 371            | Acyltransferase (PF01553)                                                               | 11         |

| Species                   | Acronym | Protein Accession Number | Protein Length | Protein Domain                                                                          | n° Introns |
|---------------------------|---------|--------------------------|----------------|-----------------------------------------------------------------------------------------|------------|
| <i>Zea mays</i>           | Zma     | GRMZM2G065203            | 545            | Acyltransferase (PF01553)                                                               | 1          |
| <i>Zea mays</i>           | Zma     | GRMZM2G177150            | 557            | Acyltransferase (PF01553)                                                               | 1          |
| <i>Zea mays</i>           | Zma     | GRMZM2G147917            | 511            | Acyltransferase (PF01553) and HAD (PF12710)                                             | 1          |
| <i>Zea mays</i>           | Zma     | GRMZM2G064590            | 521            | Acyltransferase (PF01553)                                                               | 1          |
| <i>Zea mays</i>           | Zma     | GRMZM2G124042            | 506            | Acyltransferase (PF01553)                                                               | 1          |
| <i>Zea mays</i>           | Zma     | GRMZM2G166176            | 498            | Acyltransferase (PF01553)                                                               | 1          |
| <i>Zea mays</i>           | Zma     | GRMZM2G083195            | 502            | Acyltransferase (PF01553)                                                               | 1          |
| <i>Zea mays</i>           | Zma     | GRMZM2G059637            | 512            | HAD (PF12710)                                                                           | 1          |
| <i>Zea mays</i>           | Zma     | GRMZM2G072298            | 542            | None                                                                                    | 1          |
| <i>Zea mays</i>           | Zma     | GRMZM2G156729            | 537            | Acyltransferase (PF01553)                                                               | 1          |
| <i>Zea mays</i>           | Zma     | GRMZM2G070304            | 525            | Acyltransferase (PF01553)                                                               | 1          |
| <i>Zea mays</i>           | Zma     | GRMZM2G033767            | 537            | Acyltransferase (PF01553)                                                               | 1          |
| <i>Zea mays</i>           | Zma     | GRMZM2G020320            | 515            | Acyltransferase (PF01553)                                                               | 0          |
| <i>Zea mays</i>           | Zma     | GRMZM2G131378            | 496            | Acyltransferase (PF01553)                                                               | 0          |
| <i>Zea mays</i>           | Zma     | GRMZM2G159890            | 447            | Acyltransferase (PF01553) and Glycerol-3-phosphate acyltransferase N-terminal (PF14829) | 11         |
| <i>Aquilegia coerulea</i> | Aco     | Aquca_057_00060          | 565            | Acyltransferase (PF01553)                                                               | 1          |
| <i>Aquilegia coerulea</i> | Aco     | Aquca_003_00476          | 524            | Acyltransferase (PF01553)                                                               | 1          |
| <i>Aquilegia coerulea</i> | Aco     | Aquca_045_00017          | 496            | Acyltransferase (PF01553)                                                               | 1          |
| <i>Aquilegia coerulea</i> | Aco     | Aquca_029_00122          | 540            | Acyltransferase (PF01553)                                                               | 1          |
| <i>Aquilegia coerulea</i> | Aco     | Aquca_004_00312          | 495            | Acyltransferase (PF01553)                                                               | 1          |
| <i>Aquilegia coerulea</i> | Aco     | Aquca_025_00147          | 509            | Acyltransferase (PF01553) and HAD (PF12710)                                             | 1          |
| <i>Aquilegia coerulea</i> | Aco     | Aquca_045_00015          | 482            | Acyltransferase (PF01553)                                                               | 1          |
| <i>Aquilegia coerulea</i> | Aco     | Aquca_004_00505          | 499            | Acyltransferase (PF01553)                                                               | 1          |
| <i>Aquilegia coerulea</i> | Aco     | Aquca_010_00671          | 477            | Acyltransferase (PF01553)                                                               | 1          |
| <i>Aquilegia coerulea</i> | Aco     | Aquca_013_00284          | 499            | Acyltransferase (PF01553)                                                               | 1          |
| <i>Aquilegia coerulea</i> | Aco     | Aquca_009_00928          | 490            | Acyltransferase (PF01553)                                                               | 1          |
| <i>Aquilegia coerulea</i> | Aco     | Aquca_009_00929          | 461            | Acyltransferase (PF01553)                                                               | 1          |
| <i>Aquilegia coerulea</i> | Aco     | Aquca_001_00233          | 361            | Acyltransferase (PF01553)                                                               | 11         |
| <i>Aquilegia coerulea</i> | Aco     | Aquca_047_00038          | 362            | Acyltransferase (PF01553)                                                               | 11         |
| <i>Aquilegia coerulea</i> | Aco     | Aqcoe3G171100            | 376            | Acyltransferase (PF01553) and Glycerol-3-phosphate acyltransferase N-terminal (PF14829) | 13         |
| <i>Mimulus guttatus</i>   | Mgu     | Migut.M00497             | 547            | Acyltransferase (PF01553)                                                               | 1          |
| <i>Mimulus guttatus</i>   | Mgu     | Migut.M00495             | 518            | Acyltransferase (PF01553)                                                               | 2          |
| <i>Mimulus guttatus</i>   | Mgu     | Migut.J00189             | 492            | Acyltransferase (PF01553)                                                               | 1          |
| <i>Mimulus guttatus</i>   | Mgu     | Migut.L01365             | 506            | Acyltransferase (PF01553) and HAD (PF12710)                                             | 1          |
| <i>Mimulus guttatus</i>   | Mgu     | Migut.H00880             | 502            | Acyltransferase (PF01553) and HAD (PF12710)                                             | 1          |
| <i>Mimulus guttatus</i>   | Mgu     | Migut.N01447             | 504            | Acyltransferase (PF01553)                                                               | 2          |
| <i>Mimulus guttatus</i>   | Mgu     | Migut.F00761             | 503            | Acyltransferase (PF01553)                                                               | 1          |
| <i>Mimulus guttatus</i>   | Mgu     | Migut.B01763             | 507            | Acyltransferase (PF01553) and HAD (PF12710)                                             | 1          |
| <i>Mimulus guttatus</i>   | Mgu     | Migut.G00542             | 504            | Acyltransferase (PF01553)                                                               | 1          |

| Species                     | Acronym | Protein Accession Number | Protein Length | Protein Domain                                                                          | n° Introns |
|-----------------------------|---------|--------------------------|----------------|-----------------------------------------------------------------------------------------|------------|
| <i>Mimulus guttatus</i>     | Mgu     | Migut.G00541             | 495            | Acyltransferase (PF01553)                                                               | 1          |
| <i>Mimulus guttatus</i>     | Mgu     | Migut.O00899             | 358            | Acyltransferase (PF01553)                                                               | 1          |
| <i>Mimulus guttatus</i>     | Mgu     | Migut.N01350             | 370            | Acyltransferase (PF01553)                                                               | 11         |
| <i>Mimulus guttatus</i>     | Mgu     | Migut.E00743             | 458            | Acyltransferase (PF01553) and Glycerol-3-phosphate acyltransferase N-terminal (PF14829) | 12         |
| <i>Solanum lycopersicum</i> | Sly     | Solyc07g056320.2         | 546            | Acyltransferase (PF01553)                                                               | 2          |
| <i>Solanum lycopersicum</i> | Sly     | Solyc02g087500.1         | 508            | Acyltransferase (PF01553)                                                               | 1          |
| <i>Solanum lycopersicum</i> | Sly     | Solyc04g005840.1         | 499            | Acyltransferase (PF01553) and HAD (PF12710)                                             | 1          |
| <i>Solanum lycopersicum</i> | Sly     | Solyc09g014350.2         | 504            | Acyltransferase (PF01553) and HAD (PF12710)                                             | 1          |
| <i>Solanum lycopersicum</i> | Sly     | Solyc01g094700.2         | 501            | Acyltransferase (PF01553)                                                               | 1          |
| <i>Solanum lycopersicum</i> | Sly     | Solyc04g011600.2         | 491            | Acyltransferase (PF01553)                                                               | 2          |
| <i>Solanum lycopersicum</i> | Sly     | Solyc05g053030.1         | 502            | None                                                                                    | 1          |
| <i>Solanum lycopersicum</i> | Sly     | Solyc10g084900.1         | 486            | Acyltransferase (PF01553) and HAD (PF12710)                                             | 0          |
| <i>Solanum lycopersicum</i> | Sly     | Solyc08g082340.2         | 371            | Acyltransferase (PF01553)                                                               | 11         |
| <i>Solanum lycopersicum</i> | Sly     | Solyc08g076470.2         | 470            | Acyltransferase (PF01553) and Glycerol-3-phosphate acyltransferase N-terminal (PF14829) | 13         |
| <i>Solanum tuberosum</i>    | Stu     | PGSC0003DMG400012284     | 371            | Acyltransferase (PF01553)                                                               | 11         |
| <i>Solanum tuberosum</i>    | Stu     | PGSC0003DMG400017301     | 544            | Acyltransferase (PF01553)                                                               | 2          |
| <i>Solanum tuberosum</i>    | Stu     | PGSC0003DMG400002838     | 502            | Acyltransferase (PF01553) and HAD (PF12710)                                             | 1          |
| <i>Solanum tuberosum</i>    | Stu     | PGSC0003DMG400040955     | 508            | Acyltransferase (PF01553)                                                               | 1          |
| <i>Solanum tuberosum</i>    | Stu     | PGSC0003DMG400001404     | 480            | Acyltransferase (PF01553)                                                               | 1          |
| <i>Solanum tuberosum</i>    | Stu     | PGSC0003DMG400000046     | 501            | Acyltransferase (PF01553)                                                               | 1          |
| <i>Solanum tuberosum</i>    | Stu     | PGSC0003DMG400020315     | 506            | Acyltransferase (PF01553) and HAD (PF12710)                                             | 1          |
| <i>Solanum tuberosum</i>    | Stu     | PGSC0003DMG400011080     | 493            | Acyltransferase (PF01553) and HAD (PF12710)                                             | 0          |
| <i>Solanum tuberosum</i>    | Stu     | PGSC0003DMG400011079     | 494            | Acyltransferase (PF01553)                                                               | 0          |
| <i>Solanum tuberosum</i>    | Stu     | PGSC0003DMG400006342     | 396            | Acyltransferase (PF01553)                                                               | 2          |
| <i>Solanum tuberosum</i>    | Stu     | PGSC0003DMG400011077     | 489            | Acyltransferase (PF01553)                                                               | 0          |
| <i>Solanum tuberosum</i>    | Stu     | PGSC0003DMG400028523     | 302            | Acyltransferase (PF01553)                                                               | 0          |
| <i>Solanum tuberosum</i>    | Stu     | PGSC0003DMT400032021     | 371            | Acyltransferase (PF01553)                                                               | 10         |
| <i>Eucalyptus grandis</i>   | Egr     | Eucgr.A01977             | 549            | Acyltransferase (PF01553)                                                               | 1          |
| <i>Eucalyptus grandis</i>   | Egr     | Eucgr.F04388             | 517            | Acyltransferase (PF01553)                                                               | 1          |
| <i>Eucalyptus grandis</i>   | Egr     | Eucgr.B03397             | 503            | Acyltransferase (PF01553) and HAD (PF12710)                                             | 1          |
| <i>Eucalyptus grandis</i>   | Egr     | Eucgr.K03558             | 554            | Acyltransferase (PF01553)                                                               | 1          |
| <i>Eucalyptus grandis</i>   | Egr     | Eucgr.F04389             | 457            | Acyltransferase (PF01553)                                                               | 1          |
| <i>Eucalyptus grandis</i>   | Egr     | Eucgr.A00515             | 509            | Acyltransferase (PF01553)                                                               | 1          |
| <i>Eucalyptus grandis</i>   | Egr     | Eucgr.E00121             | 503            | Acyltransferase (PF01553)                                                               | 2          |
| <i>Eucalyptus grandis</i>   | Egr     | Eucgr.J01235             | 489            | Acyltransferase (PF01553)                                                               | 1          |
| <i>Eucalyptus grandis</i>   | Egr     | Eucgr.G02949             | 519            | HAD (PF12710)                                                                           | 1          |
| <i>Eucalyptus grandis</i>   | Egr     | Eucgr.I01507             | 375            | Acyltransferase (PF01553)                                                               | 11         |
| <i>Eucalyptus grandis</i>   | Egr     | Eucgr.E00228             | 401            | Acyltransferase (PF01553) and Glycerol-3-phosphate acyltransferase N-terminal (PF14829) | 12         |
| <i>Eucalyptus grandis</i>   | Egr     | Eucgr.E01634             | 285            | Acyltransferase (PF01553)                                                               | 8          |

| Species                    | Acronym | Protein Accession Number | Protein Length | Protein Domain                                                                          | n° Introns |
|----------------------------|---------|--------------------------|----------------|-----------------------------------------------------------------------------------------|------------|
| <i>Manihot esculenta</i>   | Mes     | Manes.02G084800          | 532            | Acyltransferase (PF01553)                                                               | 1          |
| <i>Manihot esculenta</i>   | Mes     | Manes.01G127800          | 539            | Acyltransferase (PF01553)                                                               | 1          |
| <i>Manihot esculenta</i>   | Mes     | Manes.02G157300          | 514            | Acyltransferase (PF01553)                                                               | 1          |
| <i>Manihot esculenta</i>   | Mes     | Manes.01G230400          | 546            | Acyltransferase (PF01553)                                                               | 1          |
| <i>Manihot esculenta</i>   | Mes     | Manes.05G012900          | 546            | Acyltransferase (PF01553)                                                               | 1          |
| <i>Manihot esculenta</i>   | Mes     | Manes.01G193000          | 501            | Acyltransferase (PF01553) and HAD (PF12710)                                             | 1          |
| <i>Manihot esculenta</i>   | Mes     | Manes.09G103500          | 505            | Acyltransferase (PF01553) and HAD (PF12710)                                             | 1          |
| <i>Manihot esculenta</i>   | Mes     | Manes.08G089900          | 503            | Acyltransferase (PF01553)                                                               | 1          |
| <i>Manihot esculenta</i>   | Mes     | Manes.07G118400          | 491            | Acyltransferase (PF01553)                                                               | 1          |
| <i>Manihot esculenta</i>   | Mes     | Manes.01G255900          | 500            | Acyltransferase (PF01553)                                                               | 2          |
| <i>Manihot esculenta</i>   | Mes     | Manes.11G106900          | 375            | Acyltransferase (PF01553)                                                               | 11         |
| <i>Populus trichocarpa</i> | Ptr     | Potri.005G202200         | 542            | Acyltransferase (PF01553)                                                               | 1          |
| <i>Populus trichocarpa</i> | Ptr     | Potri.002G192600         | 552            | Acyltransferase (PF01553)                                                               | 1          |
| <i>Populus trichocarpa</i> | Ptr     | Potri.016G063900         | 501            | Acyltransferase (PF01553) and HAD (PF12710)                                             | 1          |
| <i>Populus trichocarpa</i> | Ptr     | Potri.006G198100         | 501            | Acyltransferase (PF01553) and HAD (PF12710)                                             | 1          |
| <i>Populus trichocarpa</i> | Ptr     | Potri.016G113100         | 500            | Acyltransferase (PF01553) and HAD (PF12710)                                             | 1          |
| <i>Populus trichocarpa</i> | Ptr     | Potri.006G097800         | 497            | Acyltransferase (PF01553) and HAD (PF12710)                                             | 1          |
| <i>Populus trichocarpa</i> | Ptr     | Potri.010G201200         | 488            | Acyltransferase (PF01553)                                                               | 1          |
| <i>Populus trichocarpa</i> | Ptr     | Potri.008G058200         | 489            | Acyltransferase (PF01553)                                                               | 1          |
| <i>Populus trichocarpa</i> | Ptr     | Potri.014G085500         | 500            | Acyltransferase (PF01553)                                                               | 2          |
| <i>Populus trichocarpa</i> | Ptr     | Potri.001G136600         | 453            | Acyltransferase (PF01553) and Glycerol-3-phosphate acyltransferase N-terminal (PF14829) | 12         |
| <i>Ricinus communis</i>    | Rco     | 30122.t000017            | 360            | Acyltransferase (PF01553)                                                               | 10         |
| <i>Ricinus communis</i>    | Rco     | 28350.t000007            | 537            | Acyltransferase (PF01553)                                                               | 1          |
| <i>Ricinus communis</i>    | Rco     | 29736.t000066            | 504            | Acyltransferase (PF01553) and HAD (PF12710)                                             | 1          |
| <i>Ricinus communis</i>    | Rco     | 29822.t000116            | 512            | Acyltransferase (PF01553) and HAD (PF12710)                                             | 1          |
| <i>Ricinus communis</i>    | Rco     | 29908.t000018            | 543            | Acyltransferase (PF01553)                                                               | 1          |
| <i>Ricinus communis</i>    | Rco     | 30076.t000182            | 509            | Acyltransferase (PF01553)                                                               | 3          |
| <i>Ricinus communis</i>    | Rco     | 30174.t000012            | 501            | Acyltransferase (PF01553) and HAD (PF12710)                                             | 2          |
| <i>Ricinus communis</i>    | Rco     | 27568.t000015            | 490            | Acyltransferase (PF01553)                                                               | 1          |
| <i>Ricinus communis</i>    | Rco     | 29969.t000007            | 293            | Acyltransferase (PF01553)                                                               | 1          |
| <i>Ricinus communis</i>    | Rco     | 30068.t000150            | 455            | Acyltransferase (PF01553) and Glycerol-3-phosphate acyltransferase N-terminal (PF14829) | 11         |
| <i>Citrus sinensis</i>     | Csi     | orange1.1g009120m.g      | 543            | Acyltransferase (PF01553)                                                               | 1          |
| <i>Citrus sinensis</i>     | Csi     | orange1.1g009762m.g      | 526            | Acyltransferase (PF01553)                                                               | 1          |
| <i>Citrus sinensis</i>     | Csi     | orange1.1g042288m.g      | 515            | Acyltransferase (PF01553) and HAD (PF12710)                                             | 1          |
| <i>Citrus sinensis</i>     | Csi     | orange1.1g042170m.g      | 543            | Acyltransferase (PF01553)                                                               | 1          |
| <i>Citrus sinensis</i>     | Csi     | orange1.1g043920m.g      | 504            | Acyltransferase (PF01553)                                                               | 1          |
| <i>Citrus sinensis</i>     | Csi     | orange1.1g010860m.g      | 499            | Acyltransferase (PF01553)                                                               | 2          |
| <i>Citrus sinensis</i>     | Csi     | orange1.1g018906m.g      | 349            | Acyltransferase (PF01553)                                                               | 2          |
| <i>Citrus sinensis</i>     | Csi     | orange1.1g038704m.g      | 237            | Acyltransferase (PF01553)                                                               | 0          |

| Species                    | Acronym | Protein Accession Number | Protein Length | Protein Domain                                                                          | n° Introns |
|----------------------------|---------|--------------------------|----------------|-----------------------------------------------------------------------------------------|------------|
| <i>Citrus sinensis</i>     | Csi     | orange1.lg017205m        | 375            | Acyltransferase (PF01553)                                                               | 11         |
| <i>Citrus clementina</i>   | Ccl     | Ciclev10028672m.g        | 375            | Acyltransferase (PF01553)                                                               | 11         |
| <i>Citrus clementina</i>   | Ccl     | Ciclev10031163m.g        | 543            | Acyltransferase (PF01553)                                                               | 1          |
| <i>Citrus clementina</i>   | Ccl     | Ciclev10001145m.g        | 447            | Acyltransferase (PF01553)                                                               | 1          |
| <i>Citrus clementina</i>   | Ccl     | Ciclev10013880m.g        | 515            | Acyltransferase (PF01553) and HAD (PF12710)                                             | 1          |
| <i>Citrus clementina</i>   | Ccl     | Ciclev10023483m.g        | 543            | Acyltransferase (PF01553)                                                               | 1          |
| <i>Citrus clementina</i>   | Ccl     | Ciclev10033948m.g        | 504            | Acyltransferase (PF01553)                                                               | 1          |
| <i>Citrus clementina</i>   | Ccl     | Ciclev10011536m.g        | 503            | Acyltransferase (PF01553) and HAD (PF12710)                                             | 1          |
| <i>Citrus clementina</i>   | Ccl     | Ciclev10031344m.g        | 490            | Acyltransferase (PF01553)                                                               | 1          |
| <i>Citrus clementina</i>   | Ccl     | Ciclev10019825m.g        | 499            | Acyltransferase (PF01553)                                                               | 2          |
| <i>Citrus clementia</i>    | Ccl     | Ciclev10001047m.g        | 469            | Acyltransferase (PF01553) and Glycerol-3-phosphate acyltransferase N-terminal (PF14829) | 12         |
| <i>Gossypium raimondii</i> | Gra     | Gorai.012G158300         | 378            | Acyltransferase (PF01553)                                                               | 11         |
| <i>Gossypium raimondii</i> | Gra     | Gorai.005G258500         | 377            | Acyltransferase (PF01553)                                                               | 11         |
| <i>Gossypium raimondii</i> | Gra     | Gorai.008G098000         | 541            | Acyltransferase (PF01553)                                                               | 1          |
| <i>Gossypium raimondii</i> | Gra     | Gorai.006G181200         | 504            | Acyltransferase (PF01553) and HAD (PF12710)                                             | 1          |
| <i>Gossypium raimondii</i> | Gra     | Gorai.010G045500         | 516            | Acyltransferase (PF01553)                                                               | 1          |
| <i>Gossypium raimondii</i> | Gra     | Gorai.007G078200         | 510            | Acyltransferase (PF01553) and HAD (PF12710)                                             | 1          |
| <i>Gossypium raimondii</i> | Gra     | Gorai.004G145100         | 543            | Acyltransferase (PF01553)                                                               | 1          |
| <i>Gossypium raimondii</i> | Gra     | Gorai.012G112800         | 515            | Acyltransferase (PF01553)                                                               | 1          |
| <i>Gossypium raimondii</i> | Gra     | Gorai.011G151300         | 504            | Acyltransferase (PF01553) and HAD (PF12710)                                             | 1          |
| <i>Gossypium raimondii</i> | Gra     | Gorai.004G235900         | 538            | Acyltransferase (PF01553)                                                               | 1          |
| <i>Gossypium raimondii</i> | Gra     | Gorai.011G267100         | 494            | Acyltransferase (PF01553)                                                               | 1          |
| <i>Gossypium raimondii</i> | Gra     | Gorai.012G071300         | 488            | Acyltransferase (PF01553)                                                               | 1          |
| <i>Gossypium raimondii</i> | Gra     | Gorai.007G100100         | 500            | Acyltransferase (PF01553)                                                               | 2          |
| <i>Gossypium raimondii</i> | Gra     | Gorai.011G267200         | 405            | Acyltransferase (PF01553)                                                               | 3          |
| <i>Gossypium raimondii</i> | Gra     | Gorai.007G033500         | 440            | Acyltransferase (PF01553) and Glycerol-3-phosphate acyltransferase N-terminal (PF14829) | 11         |
| <i>Gossypium raimondii</i> | Gra     | Gorai.004G182200         | 446            | Acyltransferase (PF01553) and Glycerol-3-phosphate acyltransferase N-terminal (PF14829) | 12         |
| <i>Gossypium raimondii</i> | Gra     | Gorai.003G185500         | 461            | Acyltransferase (PF01553) and Glycerol-3-phosphate acyltransferase N-terminal (PF14829) | 12         |
| <i>Theobroma cacao</i>     | Tca     | Thecc1EG006479           | 416            | Acyltransferase (PF01553)                                                               | 12         |
| <i>Theobroma cacao</i>     | Tca     | Thecc1EG001873           | 540            | Acyltransferase (PF01553)                                                               | 1          |
| <i>Theobroma cacao</i>     | Tca     | Thecc1EG034986           | 553            | Acyltransferase (PF01553)                                                               | 2          |
| <i>Theobroma cacao</i>     | Tca     | Thecc1EG034985           | 522            | Acyltransferase (PF01553)                                                               | 1          |
| <i>Theobroma cacao</i>     | Tca     | Thecc1EG004855           | 537            | Acyltransferase (PF01553)                                                               | 1          |
| <i>Theobroma cacao</i>     | Tca     | Thecc1EG021737           | 503            | Acyltransferase (PF01553) and HAD (PF12710)                                             | 1          |
| <i>Theobroma cacao</i>     | Tca     | Thecc1EG018071           | 507            | Acyltransferase (PF01553) and HAD (PF12710)                                             | 1          |
| <i>Theobroma cacao</i>     | Tca     | Thecc1EG026783           | 531            | Acyltransferase (PF01553)                                                               | 1          |
| <i>Theobroma cacao</i>     | Tca     | Thecc1EG010070           | 593            | Acyltransferase (PF01553) and HAD (PF12710)                                             | 3          |
| <i>Theobroma cacao</i>     | Tca     | Thecc1EG042716           | 488            | Acyltransferase (PF01553)                                                               | 2          |
| <i>Theobroma cacao</i>     | Tca     | Thecc1EG005317           | 500            | Acyltransferase (PF01553)                                                               | 3          |



| Species                     | Acronym | Protein Accession Number | Protein Length | Protein Domain                                                                          | n° Introns |
|-----------------------------|---------|--------------------------|----------------|-----------------------------------------------------------------------------------------|------------|
| <i>Theobroma cacao</i>      | Tca     | Thecc1EG016600           | 461            | Acyltransferase (PF01553) and Glycerol-3-phosphate acyltransferase N-terminal (PF14829) | 13         |
| <i>Arabidopsis lyrata</i>   | Aly     | 919369                   | 584            | Acyltransferase (PF01553)                                                               | 1          |
| <i>Arabidopsis lyrata</i>   | Aly     | 470198                   | 525            | Acyltransferase (PF01553)                                                               | 1          |
| <i>Arabidopsis lyrata</i>   | Aly     | 943550                   | 520            | Acyltransferase (PF01553)                                                               | 1          |
| <i>Arabidopsis lyrata</i>   | Aly     | 478480                   | 502            | Acyltransferase (PF01553)                                                               | 4          |
| <i>Arabidopsis lyrata</i>   | Aly     | 482818                   | 501            | Acyltransferase (PF01553)                                                               | 2          |
| <i>Arabidopsis lyrata</i>   | Aly     | 918798                   | 502            | Acyltransferase (PF01553)                                                               | 3          |
| <i>Arabidopsis lyrata</i>   | Aly     | 490527                   | 498            | Acyltransferase (PF01553)                                                               | 4          |
| <i>Arabidopsis lyrata</i>   | Aly     | 349873                   | 499            | Acyltransferase (PF01553)                                                               | 1          |
| <i>Arabidopsis lyrata</i>   | Aly     | 950810                   | 376            | Acyltransferase (PF01553)                                                               | 11         |
| <i>Arabidopsis lyrata</i>   | Aly     | AL1G46330                | 459            | Acyltransferase (PF01553) and Glycerol-3-phosphate acyltransferase N-terminal (PF14829) | 12         |
| <i>Arabidopsis thaliana</i> | Ath     | AT1G06520                | 585            | Acyltransferase (PF01553)                                                               | 1          |
| <i>Arabidopsis thaliana</i> | Ath     | AT1G02390                | 530            | Acyltransferase (PF01553)                                                               | 1          |
| <i>Arabidopsis thaliana</i> | Ath     | AT2G38110                | 501            | Acyltransferase (PF01553) and HAD (PF12710)                                             | 1          |
| <i>Arabidopsis thaliana</i> | Ath     | AT4G01950                | 520            | Acyltransferase (PF01553)                                                               | 1          |
| <i>Arabidopsis thaliana</i> | Ath     | AT3G11430                | 502            | Acyltransferase (PF01553) and HAD (PF12710)                                             | 1          |
| <i>Arabidopsis thaliana</i> | Ath     | AT1G01610                | 503            | Acyltransferase (PF01553) and HAD (PF12710)                                             | 3          |
| <i>Arabidopsis thaliana</i> | Ath     | AT5G06090                | 500            | Acyltransferase (PF01553) and HAD (PF12710)                                             | 1          |
| <i>Arabidopsis thaliana</i> | Ath     | AT4G00400                | 500            | Acyltransferase (PF01553) and HAD (PF12710)                                             | 3          |
| <i>Arabidopsis thaliana</i> | Ath     | AT5G06020                | 376            | Acyltransferase (PF01553)                                                               | 11         |
| <i>Arabidopsis thaliana</i> | Ath     | AT1G32200                | 459            | Acyltransferase (PF01553) and Glycerol-3-phosphate acyltransferase N-terminal (PF14829) | 12         |
| <i>Arabidopsis thaliana</i> | Ath     | AT3G11325                | 376            | None                                                                                    | 2          |
| <i>Brassica rapa</i>        | Bra     | Brara.A00307             | 376            | Acyltransferase (PF01553)                                                               | 11         |
| <i>Brassica rapa</i>        | Bra     | Brara.J01416             | 368            | Acyltransferase (PF01553)                                                               | 11         |
| <i>Brassica rapa</i>        | Bra     | Brara.J00449             | 571            | Acyltransferase (PF01553)                                                               | 1          |
| <i>Brassica rapa</i>        | Bra     | Brara.K01852             | 500            | Acyltransferase (PF01553)                                                               | 3          |
| <i>Brassica rapa</i>        | Bra     | Brara.A03408             | 502            | Acyltransferase (PF01553)                                                               | 1          |
| <i>Brassica rapa</i>        | Bra     | Brara.I00118             | 531            | Acyltransferase (PF01553)                                                               | 1          |
| <i>Brassica rapa</i>        | Bra     | Brara.C02835             | 520            | Acyltransferase (PF01553)                                                               | 1          |
| <i>Brassica rapa</i>        | Bra     | Brara.I05638             | 501            | Acyltransferase (PF01553)                                                               | 2          |
| <i>Brassica rapa</i>        | Bra     | Brara.E02936             | 500            | Acyltransferase (PF01553)                                                               | 1          |
| <i>Brassica rapa</i>        | Bra     | Brara.D02328             | 501            | Acyltransferase (PF01553)                                                               | 1          |
| <i>Brassica rapa</i>        | Bra     | Brara.J00035             | 503            | Acyltransferase (PF01553)                                                               | 2          |
| <i>Brassica rapa</i>        | Bra     | Brara.E00709             | 501            | Acyltransferase (PF01553)                                                               | 1          |
| <i>Brassica rapa</i>        | Bra     | Brara.J02607             | 498            | Acyltransferase (PF01553)                                                               | 1          |
| <i>Brassica rapa</i>        | Bra     | Brara.E02888             | 458            | Acyltransferase (PF01553)                                                               | 2          |
| <i>Brassica rapa</i>        | Bra     | Brara.H00582             | 454            | Acyltransferase (PF01553) and Glycerol-3-phosphate acyltransferase N-terminal (PF14829) | 12         |
| <i>Brassica rapa</i>        | Bra     | Brara.E01731             | 440            | Acyltransferase (PF01553) and Glycerol-3-phosphate acyltransferase N-terminal (PF14829) | 12         |
| <i>Brassica rapa</i>        | Bra     | Brara.I02607             | 443            | Acyltransferase (PF01553) and Glycerol-3-phosphate acyltransferase N-terminal (PF14829) | 12         |

| Species                     | Acronym | Protein Accession Number | Protein Length | Protein Domain                                                                          | n° Introns |
|-----------------------------|---------|--------------------------|----------------|-----------------------------------------------------------------------------------------|------------|
| <i>Capsella grandiflora</i> | Cgr     | Cagra.1671s0280          | 577            | Acyltransferase (PF01553)                                                               | 1          |
| <i>Capsella grandiflora</i> | Cgr     | Cagra.1968s0023          | 529            | Acyltransferase (PF01553)                                                               | 1          |
| <i>Capsella grandiflora</i> | Cgr     | Cagra.0334s0034          | 521            | Acyltransferase (PF01553)                                                               | 1          |
| <i>Capsella grandiflora</i> | Cgr     | Cagra.1655s0027          | 503            | Acyltransferase (PF01553)                                                               | 1          |
| <i>Capsella grandiflora</i> | Cgr     | Cagra.1968s0101          | 502            | Acyltransferase (PF01553)                                                               | 3          |
| <i>Capsella grandiflora</i> | Cgr     | Cagra.2117s0053          | 500            | Acyltransferase (PF01553)                                                               | 1          |
| <i>Capsella grandiflora</i> | Cgr     | Cagra.1261s0029          | 502            | Acyltransferase (PF01553)                                                               | 3          |
| <i>Capsella grandiflora</i> | Cgr     | Cagra.1655s0038          | 499            | Acyltransferase (PF01553)                                                               | 1          |
| <i>Capsella grandiflora</i> | Cgr     | Cagra.15555s0001         | 289            | Acyltransferase (PF01553)                                                               | 0          |
| <i>Capsella grandiflora</i> | Cgr     | Cagra.2519s0033          | 377            | Acyltransferase (PF01553)                                                               | 11         |
| <i>Capsella grandiflora</i> | Cgr     | Cagra.3957s0001          | 460            | Acyltransferase (PF01553) and Glycerol-3-phosphate acyltransferase N-terminal (PF14829) | 11         |
| <i>Capsella rubella</i>     | Cru     | Carubv10026601m.g        | 377            | Acyltransferase (PF01553)                                                               | 11         |
| <i>Capsella rubella</i>     | Cru     | Carubv10012249m          | 577            | Acyltransferase (PF01553)                                                               | 1          |
| <i>Capsella rubella</i>     | Cru     | Carubv10008716m          | 568            | Acyltransferase (PF01553)                                                               | 1          |
| <i>Capsella rubella</i>     | Cru     | Carubv10000657m          | 540            | Acyltransferase (PF01553)                                                               | 1          |
| <i>Capsella rubella</i>     | Cru     | Carubv10013500m          | 503            | Acyltransferase (PF01553)                                                               | 1          |
| <i>Capsella rubella</i>     | Cru     | Carubv10023060m          | 502            | Acyltransferase (PF01553)                                                               | 1          |
| <i>Capsella rubella</i>     | Cru     | Carubv10008926m          | 502            | Acyltransferase (PF01553)                                                               | 3          |
| <i>Capsella rubella</i>     | Cru     | Carubv10000788m          | 500            | Acyltransferase (PF01553)                                                               | 1          |
| <i>Capsella rubella</i>     | Cru     | Carubv10000780m          | 502            | Acyltransferase (PF01553)                                                               | 3          |
| <i>Capsella rubella</i>     | Cru     | Carubv10015640m          | 499            | Acyltransferase (PF01553)                                                               | 1          |
| <i>Capsella rubella</i>     | Cru     | Carubv10012611m.g        | 459            | Acyltransferase (PF01553) and Glycerol-3-phosphate acyltransferase N-terminal (PF14829) | 11         |
| <i>Eutrema salsugineum</i>  | Esa     | Thhalv10007168m          | 586            | Acyltransferase (PF01553)                                                               | 1          |
| <i>Eutrema salsugineum</i>  | Esa     | Thhalv10020574m          | 500            | Acyltransferase (PF01553)                                                               | 1          |
| <i>Eutrema salsugineum</i>  | Esa     | Thhalv10007347m          | 529            | Acyltransferase (PF01553)                                                               | 1          |
| <i>Eutrema salsugineum</i>  | Esa     | Thhalv10028577m          | 521            | Acyltransferase (PF01553)                                                               | 1          |
| <i>Eutrema salsugineum</i>  | Esa     | Thhalv10007431m          | 502            | Acyltransferase (PF01553)                                                               | 3          |
| <i>Eutrema salsugineum</i>  | Esa     | Thhalv10016551m          | 501            | Acyltransferase (PF01553)                                                               | 1          |
| <i>Eutrema salsugineum</i>  | Esa     | Thhalv10028601m          | 499            | Acyltransferase (PF01553)                                                               | 3          |
| <i>Eutrema salsugineum</i>  | Esa     | Thhalv10015521m          | 500            | Acyltransferase (PF01553)                                                               | 1          |
| <i>Eutrema salsugineum</i>  | Esa     | Thhalv10013846m.g        | 376            | Acyltransferase (PF01553)                                                               | 11         |
| <i>Eutrema salsugineum</i>  | Esa     | Thhalv10007540m.g        | 471            | Acyltransferase (PF01553) and Glycerol-3-phosphate acyltransferase N-terminal (PF14829) | 12         |
| <i>Cucumis sativus</i>      | Csa     | Cucsa.099550             | 375            | Acyltransferase (PF01553)                                                               | 10         |
| <i>Cucumis sativus</i>      | Csa     | Cucsa.185470             | 496            | Acyltransferase (PF01553)                                                               | 3          |
| <i>Cucumis sativus</i>      | Csa     | Cucsa.339200             | 511            | Acyltransferase (PF01553) and HAD (PF12710)                                             | 1          |
| <i>Cucumis sativus</i>      | Csa     | Cucsa.176200             | 505            | Acyltransferase (PF01553)                                                               | 1          |
| <i>Cucumis sativus</i>      | Csa     | Cucsa.165180             | 447            | Acyltransferase (PF01553)                                                               | 1          |
| <i>Cucumis sativus</i>      | Csa     | Cucsa.135570             | 500            | Acyltransferase (PF01553)                                                               | 2          |
| <i>Cucumis sativus</i>      | Csa     | Cucsa.204890             | 542            | Acyltransferase (PF01553)                                                               | 1          |

| Species                    | Acronym | Protein Accession Number | Protein Length | Protein Domain                                                                          | n° Introns |
|----------------------------|---------|--------------------------|----------------|-----------------------------------------------------------------------------------------|------------|
| <i>Cucumis sativus</i>     | Csa     | Cucsa.312830             | 470            | Acyltransferase (PF01553) and Glycerol-3-phosphate acyltransferase N-terminal (PF14829) | 12         |
| <i>Glycine max</i>         | Gma     | Glyma.14G028300          | 540            | Acyltransferase (PF01553)                                                               | 1          |
| <i>Glycine max</i>         | Gma     | Glyma.02G286500          | 539            | Acyltransferase (PF01553)                                                               | 1          |
| <i>Glycine max</i>         | Gma     | Glyma.18G107100          | 527            | Acyltransferase (PF01553)                                                               | 1          |
| <i>Glycine max</i>         | Gma     | Glyma.08G309200          | 533            | Acyltransferase (PF01553)                                                               | 1          |
| <i>Glycine max</i>         | Gma     | Glyma.14G167300          | 505            | Acyltransferase (PF01553)                                                               | 1          |
| <i>Glycine max</i>         | Gma     | Glyma.13G085700          | 503            | Acyltransferase (PF01553)                                                               | 1          |
| <i>Glycine max</i>         | Gma     | Glyma.03G221100          | 539            | Acyltransferase (PF01553)                                                               | 1          |
| <i>Glycine max</i>         | Gma     | Glyma.19G218100          | 540            | Acyltransferase (PF01553)                                                               | 1          |
| <i>Glycine max</i>         | Gma     | Glyma.02G010600          | 555            | Acyltransferase (PF01553)                                                               | 1          |
| <i>Glycine max</i>         | Gma     | Glyma.07G146800          | 496            | Acyltransferase (PF01553) and HAD (PF12710)                                             | 1          |
| <i>Glycine max</i>         | Gma     | Glyma.14G167400          | 497            | Acyltransferase (PF01553)                                                               | 1          |
| <i>Glycine max</i>         | Gma     | Glyma.03G221300          | 509            | Acyltransferase (PF01553)                                                               | 1          |
| <i>Glycine max</i>         | Gma     | Glyma.10G011000.         | 556            | Acyltransferase (PF01553)                                                               | 1          |
| <i>Glycine max</i>         | Gma     | Glyma.18G197800          | 539            | Acyltransferase (PF01553) and HAD (PF12710)                                             | 1          |
| <i>Glycine max</i>         | Gma     | Glyma.01G113200          | 492            | Acyltransferase (PF01553)                                                               | 1          |
| <i>Glycine max</i>         | Gma     | Glyma.03G078600          | 498            | Acyltransferase (PF01553) and HAD (PF12710)                                             | 1          |
| <i>Glycine max</i>         | Gma     | Glyma.20G070400          | 512            | Acyltransferase (PF01553)                                                               | 2          |
| <i>Glycine max</i>         | Gma     | Glyma.10G119900          | 509            | Acyltransferase (PF01553)                                                               | 2          |
| <i>Glycine max</i>         | Gma     | Glyma.02G249300          | 472            | Acyltransferase (PF01553)                                                               | 1          |
| <i>Glycine max</i>         | Gma     | Glyma.03G008300          | 500            | Acyltransferase (PF01553)                                                               | 2          |
| <i>Glycine max</i>         | Gma     | Glyma.07G069700          | 499            | Acyltransferase (PF01553)                                                               | 3          |
| <i>Glycine max</i>         | Gma     | Glyma.14G067200          | 472            | Acyltransferase (PF01553)                                                               | 1          |
| <i>Glycine max</i>         | Gma     | Glyma.06G255600          | 278            | Acyltransferase (PF01553)                                                               | 0          |
| <i>Glycine max</i>         | Gma     | Glyma.09G119200          | 376            | Acyltransferase (PF01553)                                                               | 13         |
| <i>Glycine max</i>         | Gma     | Glyma.08G085800          | 373            | Acyltransferase (PF01553)                                                               | 12         |
| <i>Glycine max</i>         | Gma     | Glyma.05G131100          | 373            | Acyltransferase (PF01553)                                                               | 12         |
| <i>Glycine max</i>         | Gma     | Glyma.01G014200          | 458            | Acyltransferase (PF01553) and Glycerol-3-phosphate acyltransferase N-terminal (PF14829) | 12         |
| <i>Glycine max</i>         | Gma     | Glyma.09G207900          | 470            | Acyltransferase (PF01553) and Glycerol-3-phosphate acyltransferase N-terminal (PF14829) | 12         |
| <i>Medicago truncatula</i> | Mtr     | Medtr4g127910            | 376            | Acyltransferase (PF01553)                                                               | 11         |
| <i>Medicago truncatula</i> | Mtr     | Medtr2g438210            | 364            | Acyltransferase (PF01553)                                                               | 11         |
| <i>Medicago truncatula</i> | Mtr     | Medtr5g091660            | 539            | Acyltransferase (PF01553)                                                               | 1          |
| <i>Medicago truncatula</i> | Mtr     | Medtr3g448430            | 511            | Acyltransferase (PF01553)                                                               | 1          |
| <i>Medicago truncatula</i> | Mtr     | Medtr5g061520            | 489            | Acyltransferase (PF01553)                                                               | 1          |
| <i>Medicago truncatula</i> | Mtr     | Medtr4g415290            | 495            | Acyltransferase (PF01553) and HAD (PF12710)                                             | 1          |
| <i>Medicago truncatula</i> | Mtr     | Medtr7g067380            | 498            | Acyltransferase (PF01553) and HAD (PF12710)                                             | 1          |
| <i>Medicago truncatula</i> | Mtr     | Medtr1g040500            | 568            | Acyltransferase (PF01553) and HAD (PF12710)                                             | 2          |
| <i>Medicago truncatula</i> | Mtr     | Medtr8g030620            | 505            | Acyltransferase (PF01553)                                                               | 2          |
| <i>Medicago truncatula</i> | Mtr     | Medtr1g086650            | 542            | Acyltransferase (PF01553)                                                               | 1          |

| Species                          | Acronym | Protein Accession Number              | Protein Length | Protein Domain                                                                          | n° Introns |
|----------------------------------|---------|---------------------------------------|----------------|-----------------------------------------------------------------------------------------|------------|
| <i>Medicago truncatula</i>       | Mtr     | Medtr5g080360                         | 493            | Acyltransferase (PF01553)                                                               | 1          |
| <i>Medicago truncatula</i>       | Mtr     | Medtr5g029230                         | 457            | Acyltransferase (PF01553) and Glycerol-3-phosphate acyltransferase N-terminal (PF14829) | 12         |
| <i>Phaseolus vulgaris</i>        | Pvu     | Phvu1.006G033100                      | 532            | Acyltransferase (PF01553)                                                               | 1          |
| <i>Phaseolus vulgaris</i>        | Pvu     | Phvu1.008G191600                      | 366            | Acyltransferase (PF01553)                                                               | 1          |
| <i>Phaseolus vulgaris</i>        | Pvu     | Phvu1.008G169500                      | 501            | Acyltransferase (PF01553)                                                               | 1          |
| <i>Phaseolus vulgaris</i>        | Pvu     | Phvu1.008G106700                      | 496            | Acyltransferase (PF01553) and HAD (PF12710)                                             | 1          |
| <i>Phaseolus vulgaris</i>        | Pvu     | Phvu1.008G169400                      | 505            | Acyltransferase (PF01553)                                                               | 1          |
| <i>Phaseolus vulgaris</i>        | Pvu     | Phvu1.007G233600                      | 512            | Acyltransferase (PF01553) and HAD (PF12710)                                             | 2          |
| <i>Phaseolus vulgaris</i>        | Pvu     | Phvu1.007G212600                      | 540            | Acyltransferase (PF01553)                                                               | 1          |
| <i>Phaseolus vulgaris</i>        | Pvu     | Phvu1.010G099700                      | 501            | Acyltransferase (PF01553) and HAD (PF12710)                                             | 2          |
| <i>Phaseolus vulgaris</i>        | Pvu     | Phvu1.L005200                         | 493            | Acyltransferase (PF01553)                                                               | 1          |
| <i>Phaseolus vulgaris</i>        | Pvu     | Phvu1.003G022900                      | 376            | Acyltransferase (PF01553)                                                               | 14         |
| <i>Phaseolus vulgaris</i>        | Pvu     | Phvu1.002G191600                      | 325            | Acyltransferase (PF01553)                                                               | 12         |
| <i>Phaseolus vulgaris</i>        | Pvu     | Phvu1.002G136600                      | 461            | Acyltransferase (PF01553) and Glycerol-3-phosphate acyltransferase N-terminal (PF14829) | 12         |
| <i>Chlamydomonas reinhardtii</i> | Cre     | Cre06.g273250                         | 456            | Acyltransferase (PF01553)                                                               | 8          |
| <i>Chlamydomonas reinhardtii</i> | Cre     | Cre02.g143000                         | 410            | Acyltransferase (PF01553) and Glycerol-3-phosphate acyltransferase N-terminal (PF14829) | 1          |
| <i>Volvox carteri</i>            | Vca     | Vocar.0002s0353                       | 435            | Acyltransferase (PF01553)                                                               | 7          |
| <i>Volvox carteri</i>            | Vca     | Vocar.0054s0035                       | 406            | Acyltransferase (PF01553) and Glycerol-3-phosphate acyltransferase N-terminal (PF14829) | 1          |
| <i>Coccomyxa subellipsoidea</i>  | Csu     | gw1.3.285.1                           | 313            | Acyltransferase (PF01553)                                                               | 4          |
| <i>Coccomyxa subellipsoidea</i>  | Csu     | estExt_Genewise1Plus.C_210008         | 429            | Acyltransferase (PF01553) and Glycerol-3-phosphate acyltransferase N-terminal (PF14829) | 5          |
| <i>Micromonas pusilla</i>        | Mpu     | MicpuC2.estExt_Genewise1Plus.C_160166 | 343            | Acyltransferase (PF01553)                                                               | 0          |
| <i>Micromonas pusilla</i>        | Mpu     | e_gw1.8.756.1                         | 452            | Acyltransferase (PF01553)                                                               | 2          |
| <i>Micromonas sp.</i>            | Msp     | estExt_Genewise2Plus.C_Chrom_050706   | 389            | Acyltransferase (PF01553)                                                               | 1          |
| <i>Micromonas sp.</i>            | Msp     | estExt_fgenes2_pg.C_Chrom_110323      | 430            | Acyltransferase (PF01553)                                                               | 1          |
| <i>Ostreococcus lucimarinus</i>  | Olu     | estExt_Genewise_ext.C_Chrom_160282    | 380            | Acyltransferase (PF01553)                                                               | 0          |
| <i>Ostreococcus lucimarinus</i>  | Olu     | eugene.0200010222                     | 429            | Acyltransferase (PF01553)                                                               | 0          |
| <i>Ostreococcus lucimarinus</i>  | Olu     | eugene1.1.0200012220                  | 429            | Acyltransferase (PF01553)                                                               | 0          |
