# Supplementary material for: Genome-wide analysis of the Glycerol-3-Phosphate Acyltransferase (GPAT) gene family reveals the evolution and diversification of plant GPATs
Source: PubMed Central journal article supplement (PMC5913721; doi:10.1590/1678-4685-gmb-2017-0076), 2018-03-19
Supplement: 1415-4757-GMB-41-01-2017-0076-s003.pdf [file 1415-4757-GMB-41-01-2017-0076-s003.pdf]

## Supplementary Material to “Genome-wide analysis of the Glycerol-3-Phosphate Acyltransferase (GPAT) gene family reveals the evolution and diversification of plant GPATs“

**Table S3** - Predictions of transmembrane domains of plant GPAT proteins. Predicted transmembrane structures of representative species were obtained using the transmembrane prediction server TMHMM-2.0 and the PROTTER tool with the complete protein sequences.

| Species                     | Gene                              | TMHMM        | Protter |   |
|-----------------------------|-----------------------------------|--------------|---------|---|
| <i>Arabidopsis thaliana</i> | GPAT1                             | 2            | 3       |   |
|                             | GPAT2                             | 1            | 4       |   |
|                             | GPAT3                             | 2            | 4       |   |
|                             | GPAT4                             | 3            | 3       |   |
|                             | GPAT5                             | 2            | 2       |   |
|                             | GPAT6                             | 3            | 3       |   |
|                             | GPAT7                             | 2            | 2       |   |
|                             | GPAT8                             | 2            | 3       |   |
|                             | GPAT9                             | 3            | 3       |   |
|                             |                                   | Soluble GPAT | 0       | 0 |
| <i>Oryza sativa</i>         | LOC_Os01g44069                    | 2            | 3       |   |
|                             | LOC_Os10g27330                    | 1            | 3       |   |
|                             | LOC_Os03g52570                    | 1            | 2       |   |
|                             | LOC_Os01g63580                    | 3            | 3       |   |
|                             | LOC_Os05g38350                    | 1            | 2       |   |
|                             | LOC_Os11g45400                    | 1            | 2       |   |
|                             | LOC_Os02g02340                    | 3            | 3       |   |
|                             | LOC_Os05g20100                    | 1            | 3       |   |
|                             | LOC_Os08g03700                    | 3            | 4       |   |
|                             | LOC_Os01g19390                    | 1            | 3       |   |
|                             | LOC_Os12g37600                    | 0            | 3       |   |
|                             | LOC_Os03g61720                    | 3            | 3       |   |
|                             | LOC_Os01g14900                    | 0            | 1       |   |
|                             | LOC_Os05g37600                    | 0            | 1       |   |
|                             | LOC_Os10g41070                    | 1            | 2       |   |
|                             | LOC_Os01g22560                    | 1            | 1       |   |
|                             | LOC_Os07g34730                    | 2            | 3       |   |
|                             | LOC_Os10g42720                    | 0            | 0       |   |
|                             | <i>Selaginella moellendorffii</i> | 80075        | 0       | 2 |
|                             |                                   | 118155       | 2       | 3 |
| 90219                       |                                   | 2            | 4       |   |
| 405228                      |                                   | 2            | 4       |   |

| Species                      | Gene            | TMHMM | Protter |
|------------------------------|-----------------|-------|---------|
|                              | 80614           | 2     | 2       |
|                              | 170163          | 2     | 3       |
|                              | 164779          | 3     | 4       |
|                              | 63752           | 2     | 3       |
|                              | 233008          | 3     | 4       |
|                              | 405007          | 0     | 3       |
|                              | 152980          | 3     | 3       |
|                              | 132845          | 0     | 0       |
| <i>Physcomitrella patens</i> | Pp3c6_29200     | 4     | 4       |
|                              | Pp3c2_18040     | 2     | 3       |
|                              | Pp3c7_7840      | 3     | 3       |
|                              | Pp3c5_1510      | 4     | 3       |
|                              | Pp3c20_9340     | 1     | 4       |
|                              | Pp3c6_29290     | 3     | 3       |
|                              | Pp3c8_21680     | 2     | 2       |
|                              | Pp3c11_26030    | 3     | 3       |
|                              | Pp3c14_5980     | 0     | 0       |
|                              | Pp3c7_2970      | 0     | 0       |
| <i>Volvox carteri</i>        | Vocar_0002s0353 | 2     | 4       |
|                              | Vocar_0054s0035 | 0     | 0       |
