# Supplementary material for: Genome-wide analysis of the Glycerol-3-Phosphate Acyltransferase (GPAT) gene family reveals the evolution and diversification of plant GPATs
Source: PubMed Central journal article supplement (PMC5913721; doi:10.1590/1678-4685-gmb-2017-0076), 2018-03-19
Supplement: 1415-4757-GMB-41-01-2017-0076-s006.pdf [file 1415-4757-GMB-41-01-2017-0076-s006.pdf]

## Supplementary Material to "Genome-wide analysis of the Glycerol-3-Phosphate Acyltransferase (GPAT) gene family reveals the evolution and diversification of plant GPATs"

**Dataset:** 10 developmental stages from data selection: AT\_AFFY\_ATH1-0

Showing 9 measure(s) of 9 gene(s) on selection: AT-0

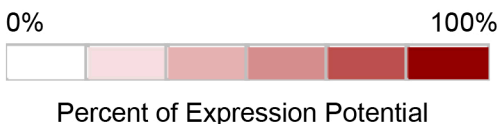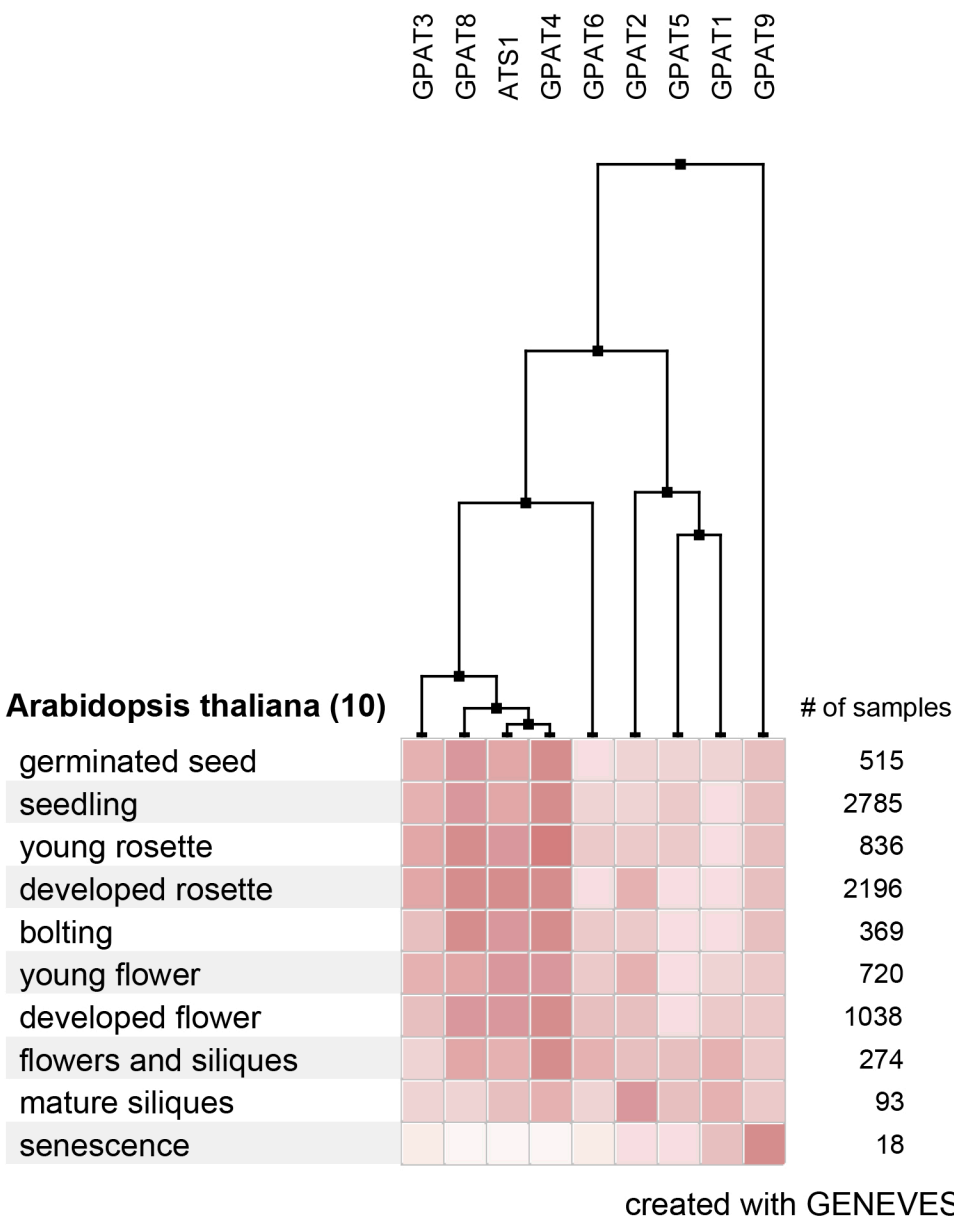

**Figure S3** - Microarray data analysis from Genevestigator showing expression pattern of GPATs in developmental stages of *Arabidopsis thaliana*.
