# Supplementary material for: Genome-wide analysis of the Glycerol-3-Phosphate Acyltransferase (GPAT) gene family reveals the evolution and diversification of plant GPATs
Source: PubMed Central journal article supplement (PMC5913721; doi:10.1590/1678-4685-gmb-2017-0076), 2018-03-19
Supplement: 1415-4757-GMB-41-01-2017-0076-s007.pdf [file 1415-4757-GMB-41-01-2017-0076-s007.pdf]

# Supplementary Material to "Genome-wide analysis of the Glycerol-3-Phosphate Acyltransferase (GPAT) gene family reveals the evolution and diversification of plant GPATs"

**Dataset:** 49 anatomical parts from data selection: GM\_AFFY\_SOYBEAN-4

Showing 8 measure(s) of 8 gene(s) on selection: GM-2

0% 100%

Percent of Expression Potential

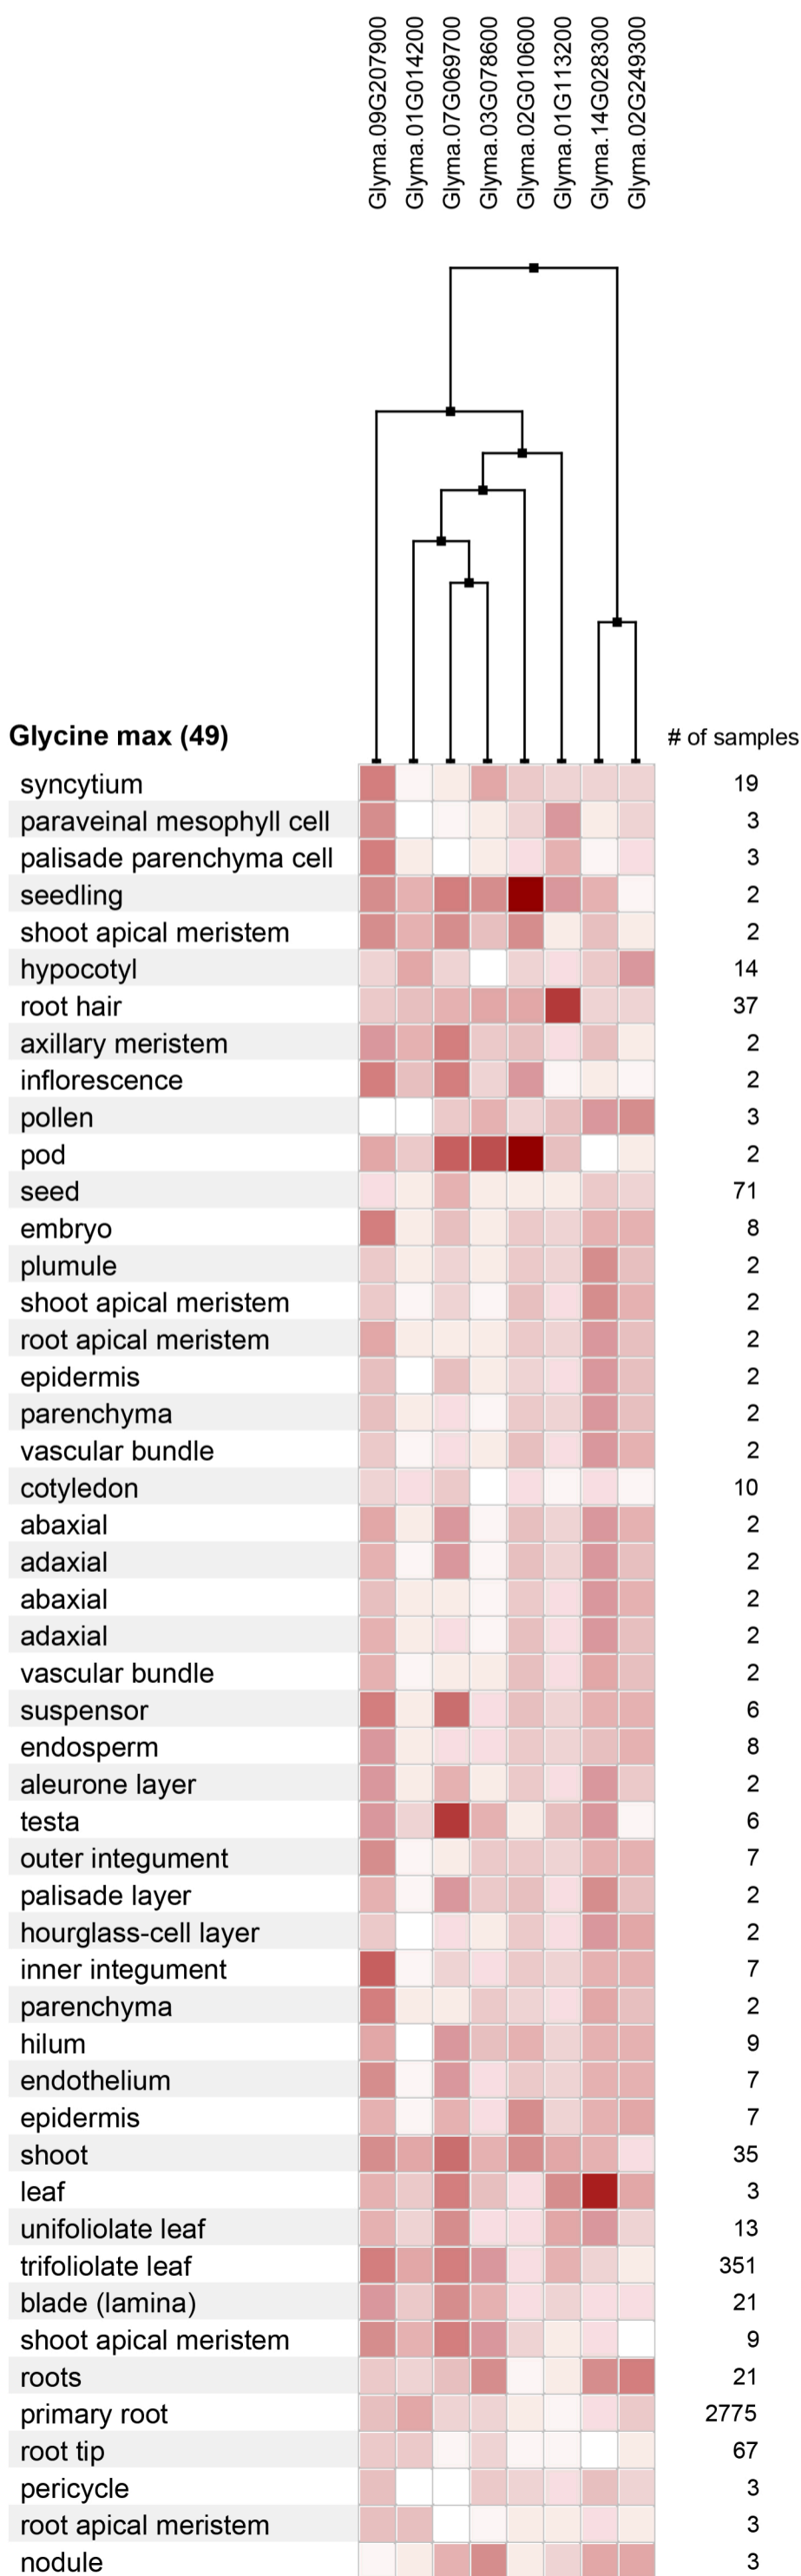

created with GENEVESTIGATOR

**Figure S4** - Microarray data analysis from Genevestigator showing expression pattern of GPATs in anatomical parts of *Glycine max*.
