# Supplementary material for: Genome-wide analysis of the Glycerol-3-Phosphate Acyltransferase (GPAT) gene family reveals the evolution and diversification of plant GPATs
Source: PubMed Central journal article supplement (PMC5913721; doi:10.1590/1678-4685-gmb-2017-0076), 2018-03-19
Supplement: 1415-4757-GMB-41-01-2017-0076-s008.pdf [file 1415-4757-GMB-41-01-2017-0076-s008.pdf]

## Supplementary Material to "Genome-wide analysis of the Glycerol-3-Phosphate Acyltransferase (GPAT) gene family reveals the evolution and diversification of plant GPATs"

**Dataset:** 5 developmental stages from data selection: GM\_AFFY\_SOYBEAN-4

Showing 8 measure(s) of 8 gene(s) on selection: GM-2

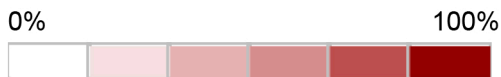

Percent of Expression Potential

Glyma.02G010600  
 Glyma.09G207900  
 Glyma.07G069700  
 Glyma.01G014200  
 Glyma.01G113200  
 Glyma.03G078600  
 Glyma.02G249300  
 Glyma.14G028300

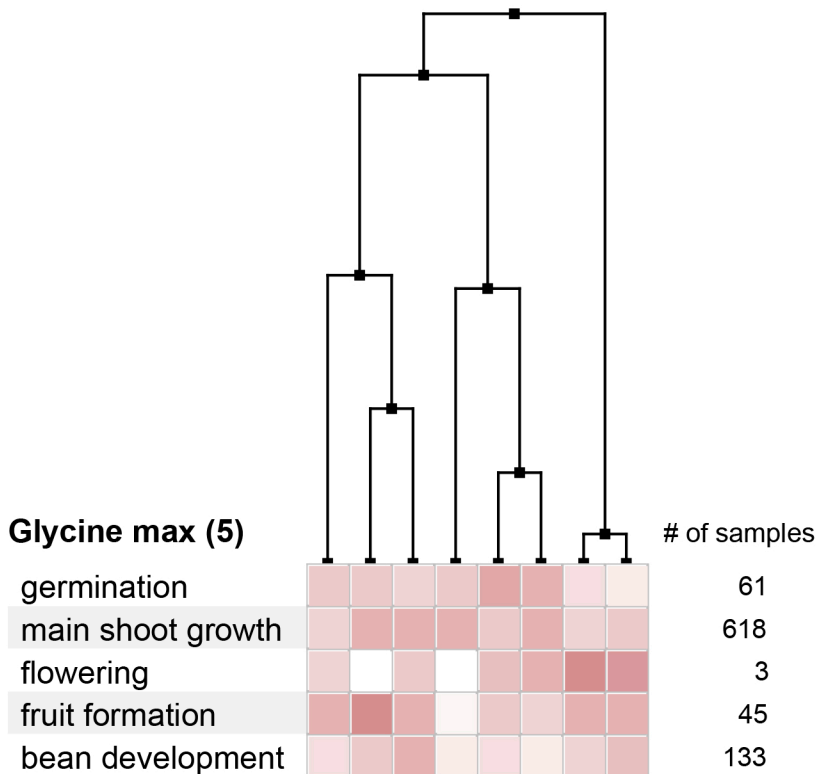

created with GENEVESTIGATOR

**Figure S5** - Microarray data analysis from Genevestigator showing expression pattern of GPATs in developmental stages of *Glycine max*.
