# Supplementary material for: Genome-wide analysis of the Glycerol-3-Phosphate Acyltransferase (GPAT) gene family reveals the evolution and diversification of plant GPATs
Source: PubMed Central journal article supplement (PMC5913721; doi:10.1590/1678-4685-gmb-2017-0076), 2018-03-19
Supplement: 1415-4757-GMB-41-01-2017-0076-s012.pdf [file 1415-4757-GMB-41-01-2017-0076-s012.pdf]

# Supplementary Material to "Genome-wide analysis of the Glycerol-3-Phosphate Acyltransferase (GPAT) gene family reveals the evolution and diversification of plant GPATs"

**Dataset:** 7 developmental stages from data selection: ZM\_mRNASeq\_MAIZE\_GL-11  
Showing 17 measure(s) of 17 gene(s) on selection: ZM-3

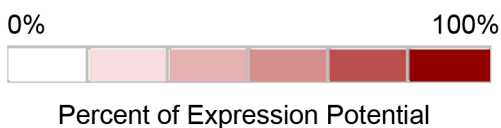

GRMZM2G124042  
GRMZM2G072298  
GRMZM2G156729  
GRMZM2G177150  
GRMZM2G064590  
GRMZM2G083195  
GRMZM2G065203  
GRMZM2G147917  
GRMZM2G070304  
GRMZM2G159890  
GRMZM2G020320  
GRMZM2G059637  
GRMZM2G166176  
GRMZM2G165681  
GRMZM2G131378  
GRMZM2G123987  
GRMZM2G033767

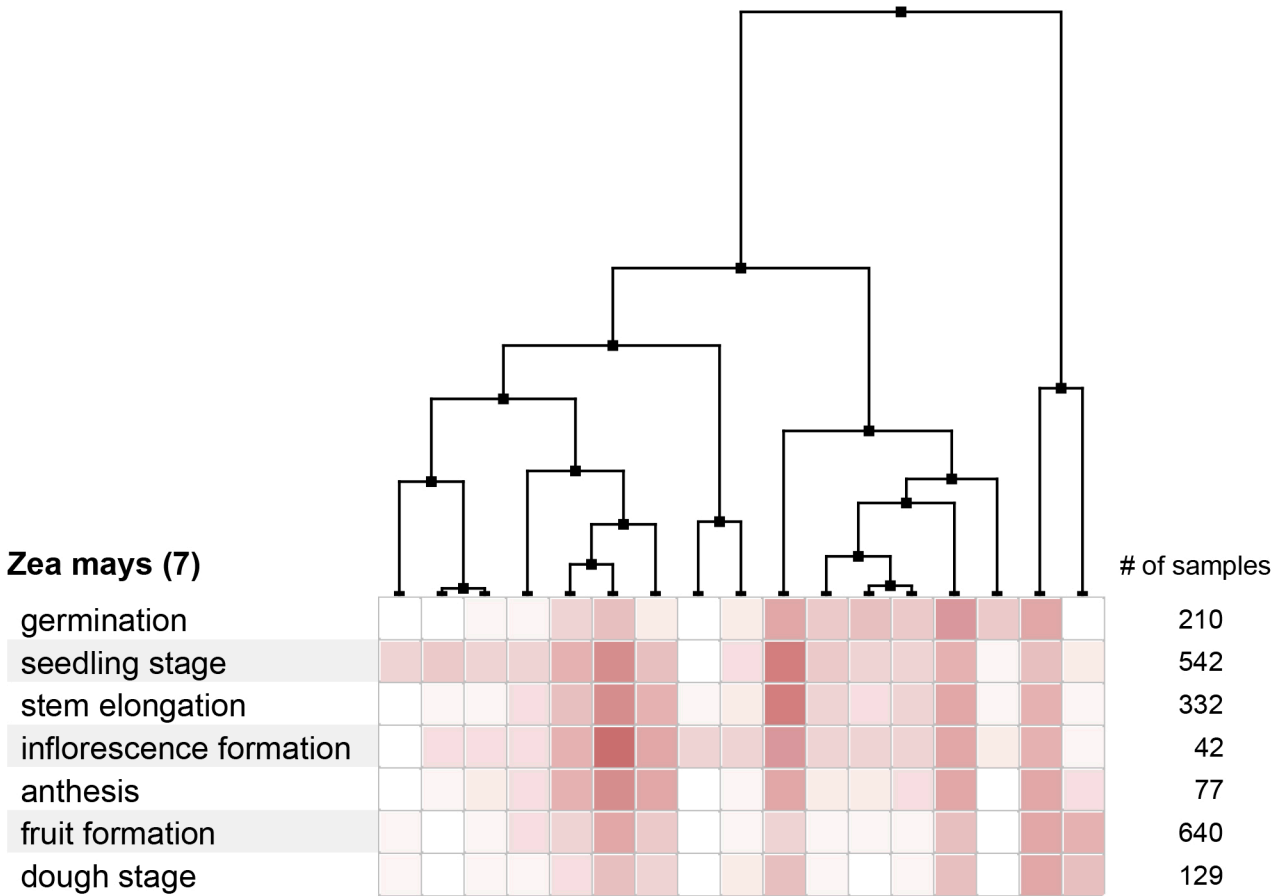

created with GENEVESTIGATOR

Figure S9 - Microarray data analysis from Genevestigator showing expression pattern of GPATs in developmental stages of *Zea mays*.
